# Supplementary material for: Iodine-promoted radical alkyl sulfuration of imidazopyridines with dialkyl azo compounds and elemental sulfur
Source: Royal Society of Chemistry journal article supplement (doi:10.1039/c8ob03191f), 2019-01-01

# Supporting Information

## Iodine-promoted Radical Alkyl Sulfuration of Imidazopyridines with Dialkyl Azo Compounds and Elemental Sulfur

Yong-Chao Gao,<sup>a</sup> Zhuo-Bin Huang,<sup>a</sup> Li Xu,<sup>a</sup> Zhao-Dong Li,<sup>\*a</sup> Zhi-Sheng Lai,<sup>a</sup> Ri-  
Yuan Tang<sup>\*ab</sup>

<sup>a</sup> Department of Applied Chemistry, College of Materials and Energy, South China Agricultural University,  
Guangzhou 510642, China.

<sup>b</sup> Key Laboratory of Natural Pesticide & Chemical Biology, Ministry of Education, South China Agricultural  
University, Guangzhou 510642, China

[rytang@scau.edu.cn](mailto:rytang@scau.edu.cn)

### List of Contents

|                                                                       |             |
|-----------------------------------------------------------------------|-------------|
| <b>1. GC-MS analysis for the Control experiment (Scheme 3, eqn 6)</b> | <b>2-3</b>  |
| <b>2. NMR Spectra for products</b>                                    | <b>4-28</b> |

1. GC-MS analysis for the Control experiment (Scheme 3, eqn 6)

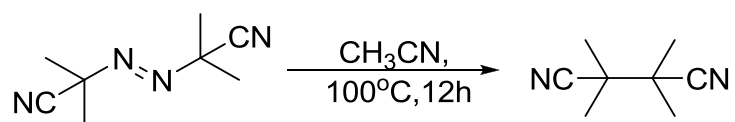

丰度

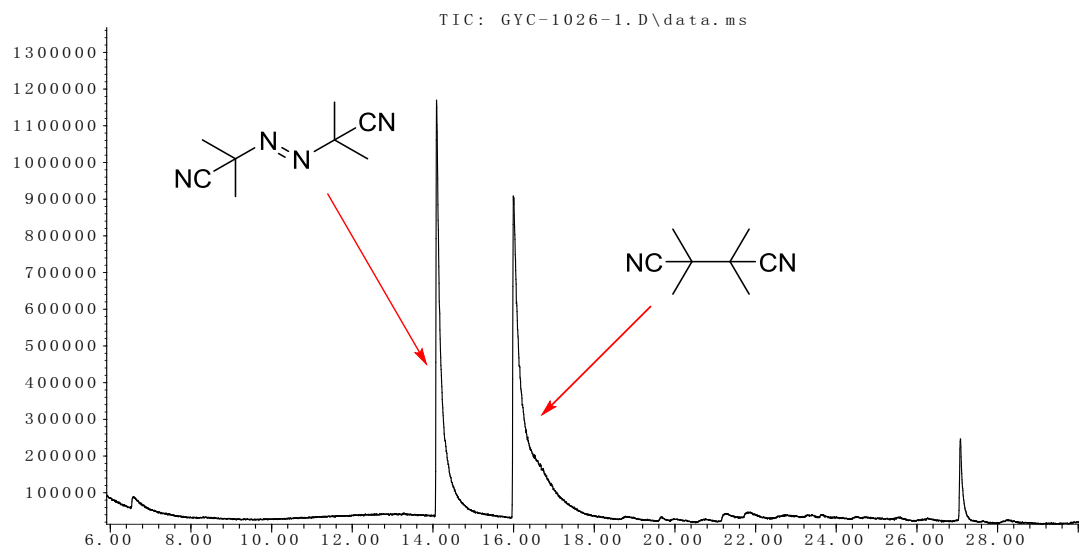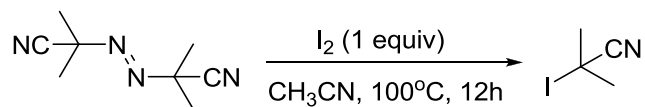

丰度

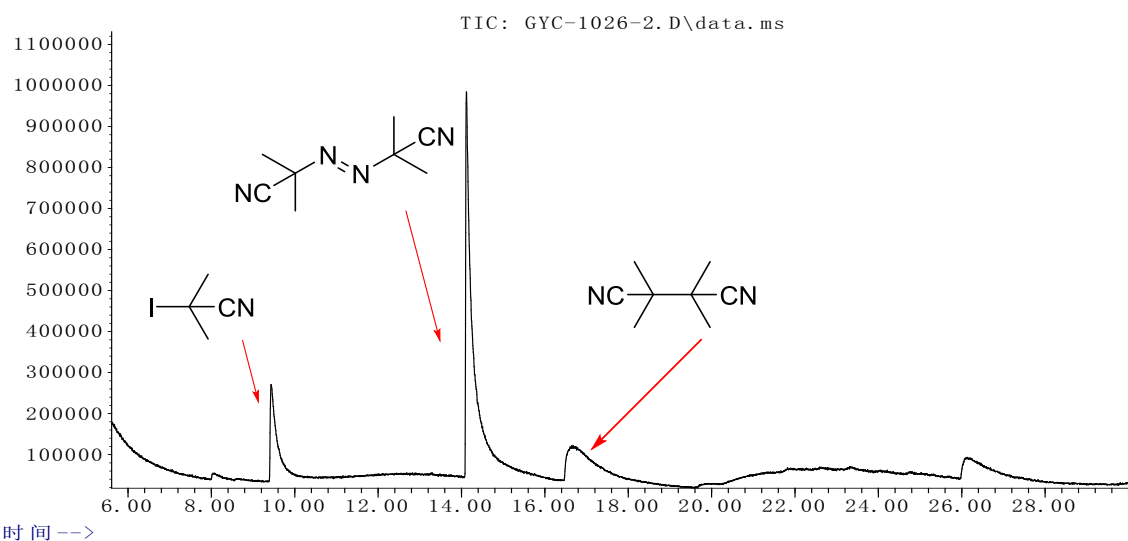

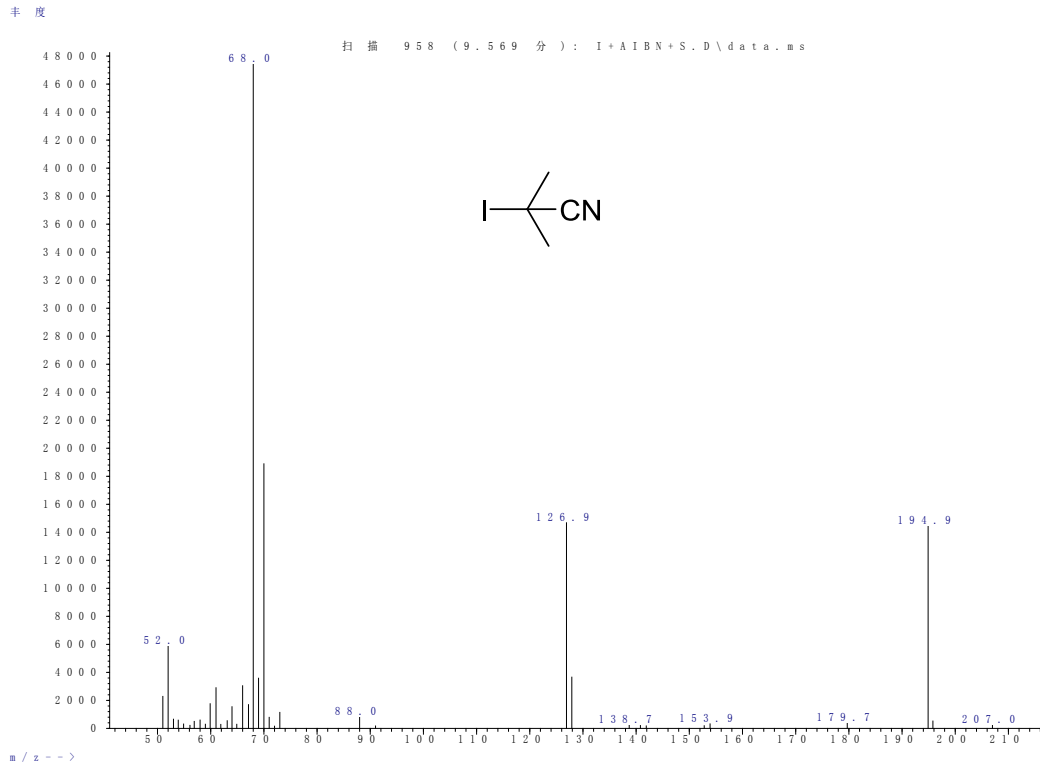

**Note:** GC-MS analysis method: initial temperature 40 °C hold for 8 minutes, temperature programming rate 8 °C/min, carrier gas flow rate 1.0 mL/min. Column model: Agilent 19091S-433; 325 °C, 30 m × 250 μm × 0.25 μm.

## 2. NMR Spectra for products

### 2-methyl-2-((2-phenylimidazo[1,2-a]pyridin-3-yl)thio)propanenitrile (3)

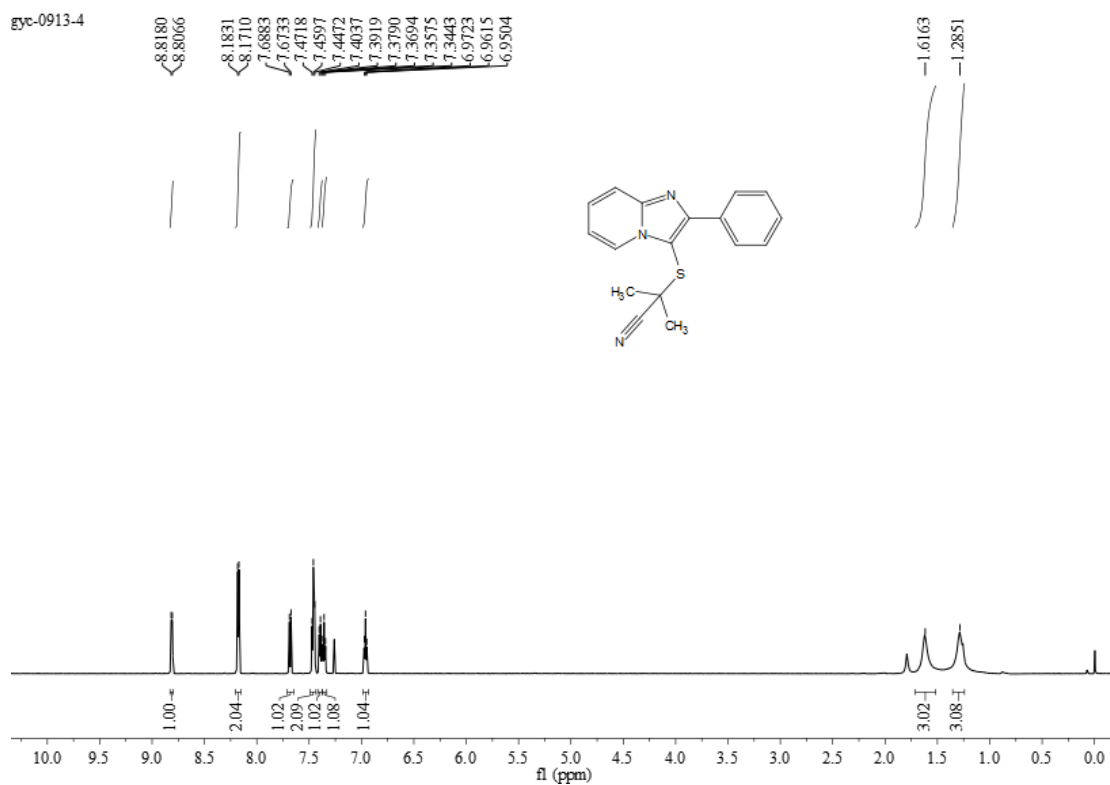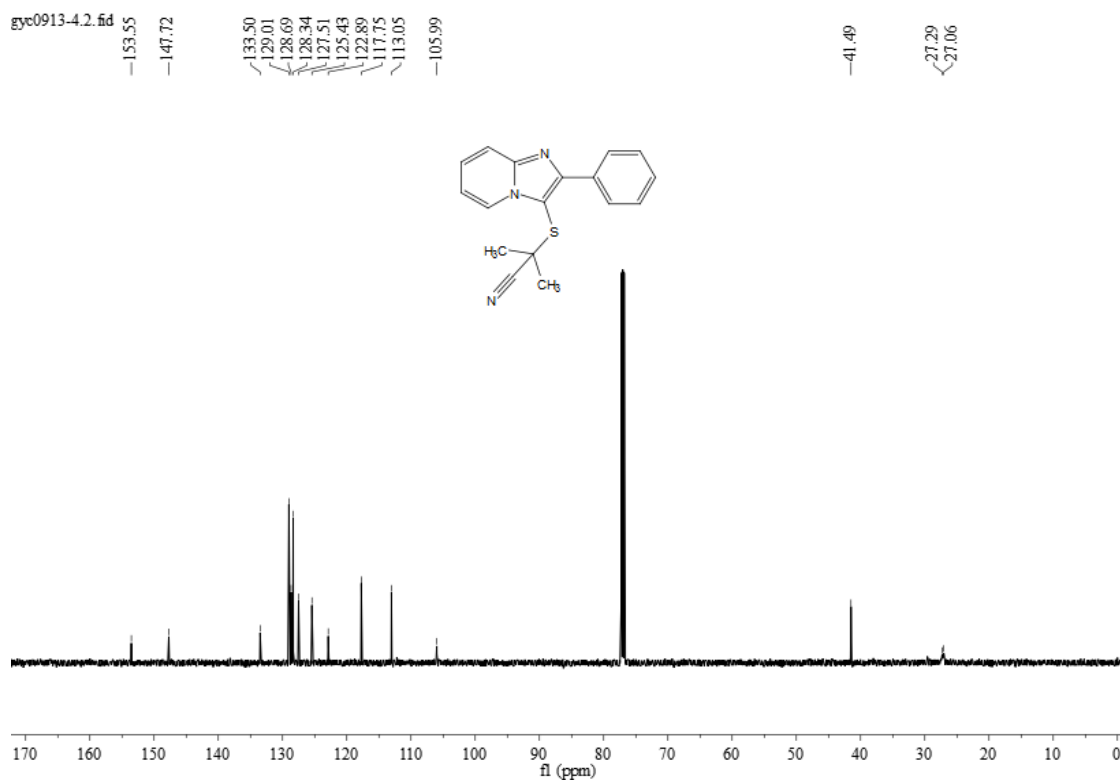

2-methyl-2-((2-(p-tolyl)imidazo[1,2-a]pyridin-3-yl)thio)propanenitrile (4)

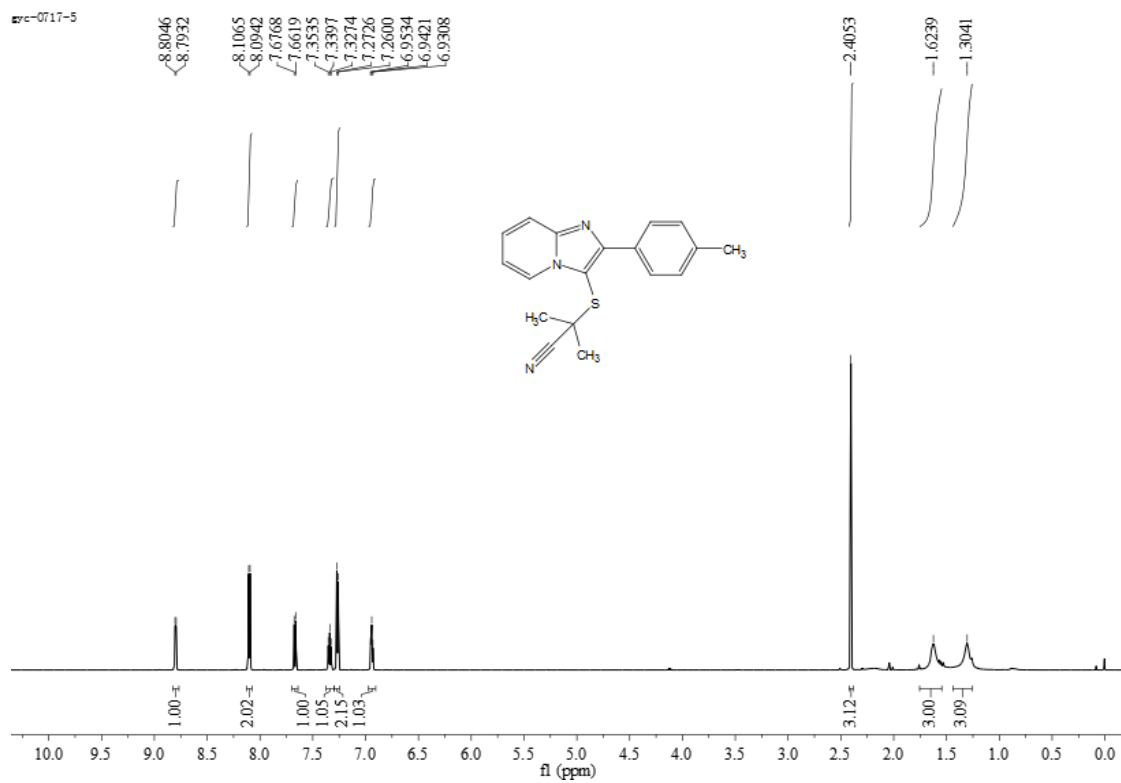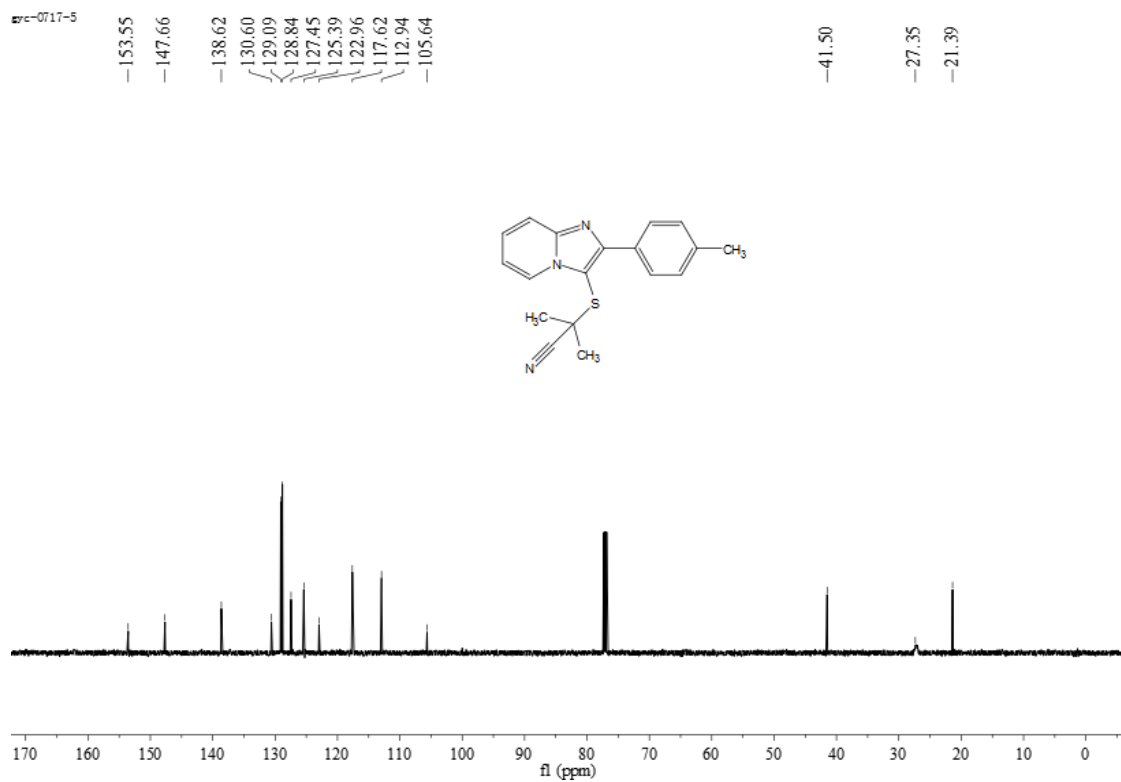

2-((2-(4-methoxyphenyl)imidazo[1,2-a]pyridin-3-yl)thio)-2-methylpropanenitrile (5)

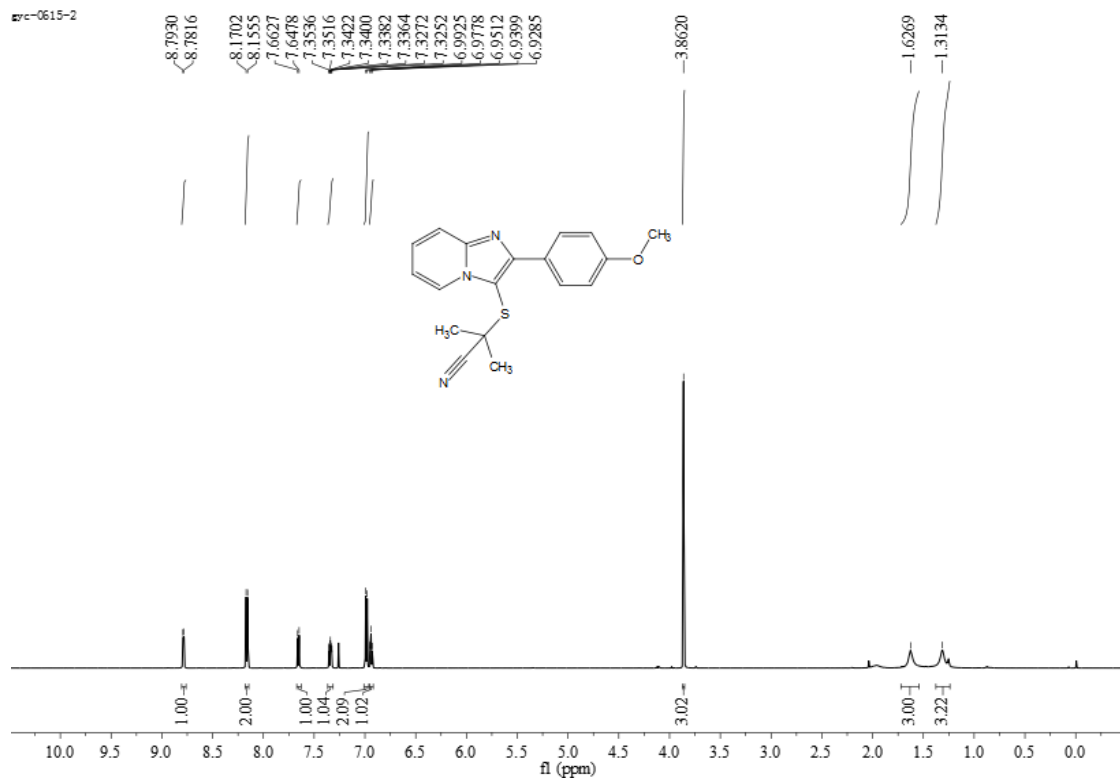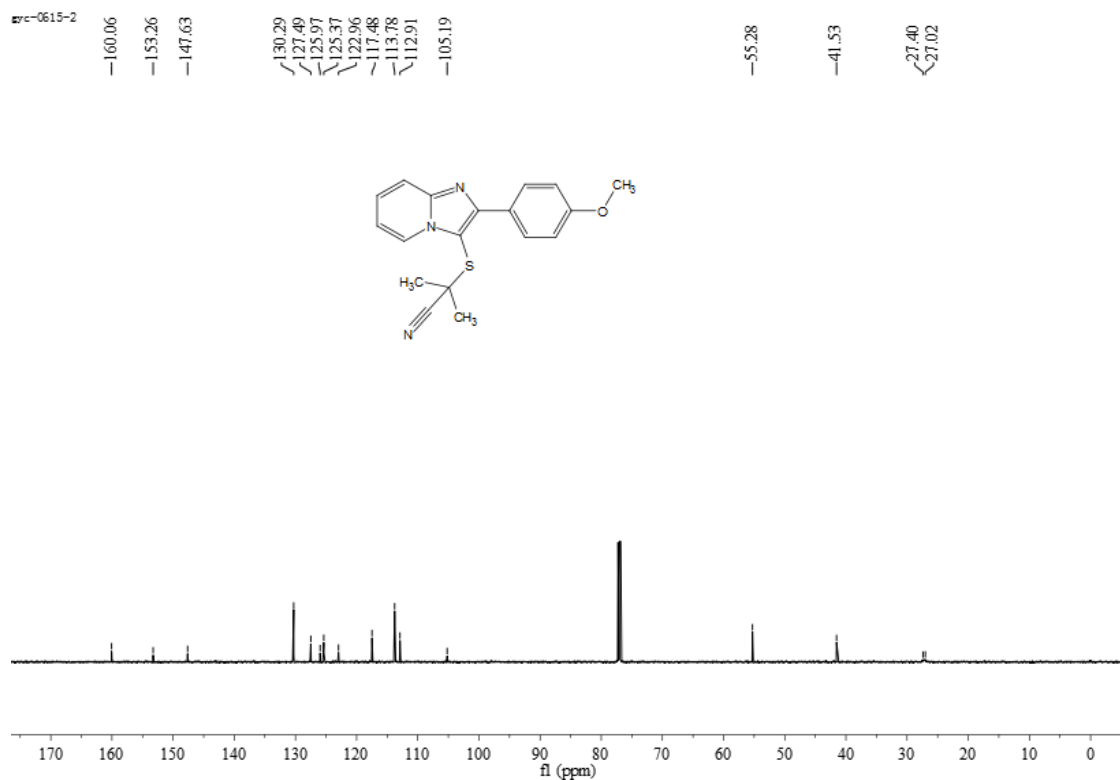

2-((2-(4-fluorophenyl)imidazo[1,2-a]pyridin-3-yl)thio)-2-methylpropanenitrile (6)

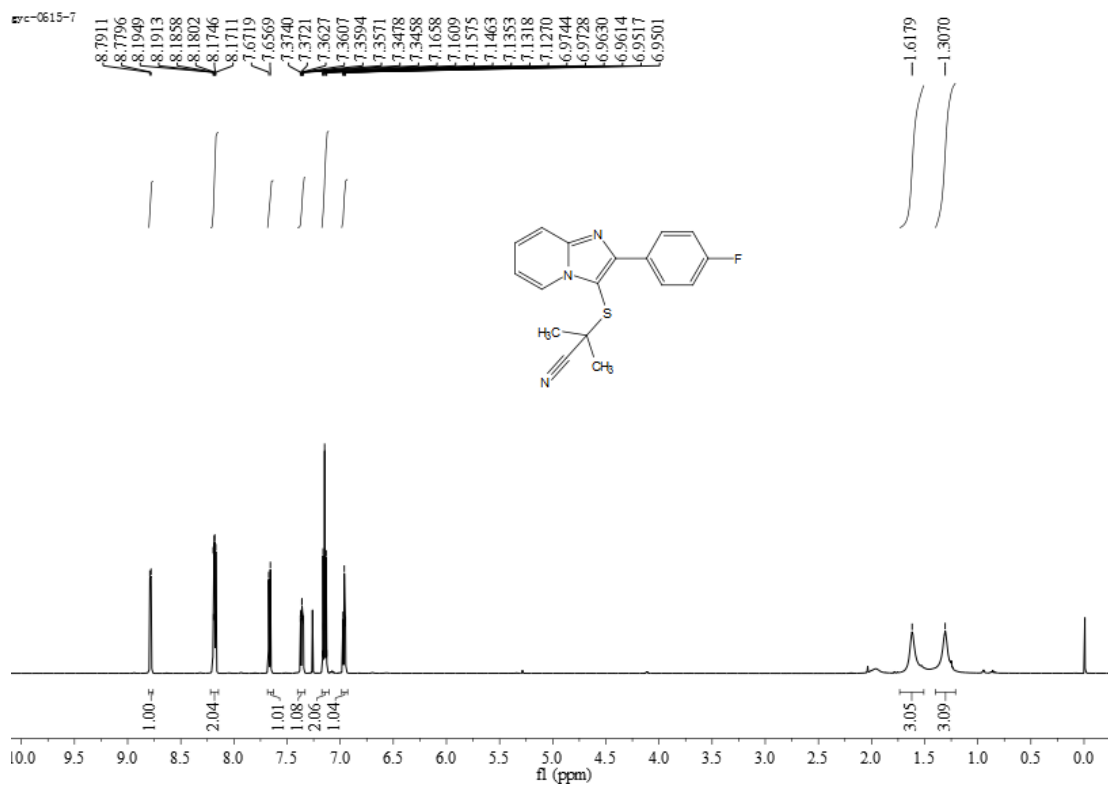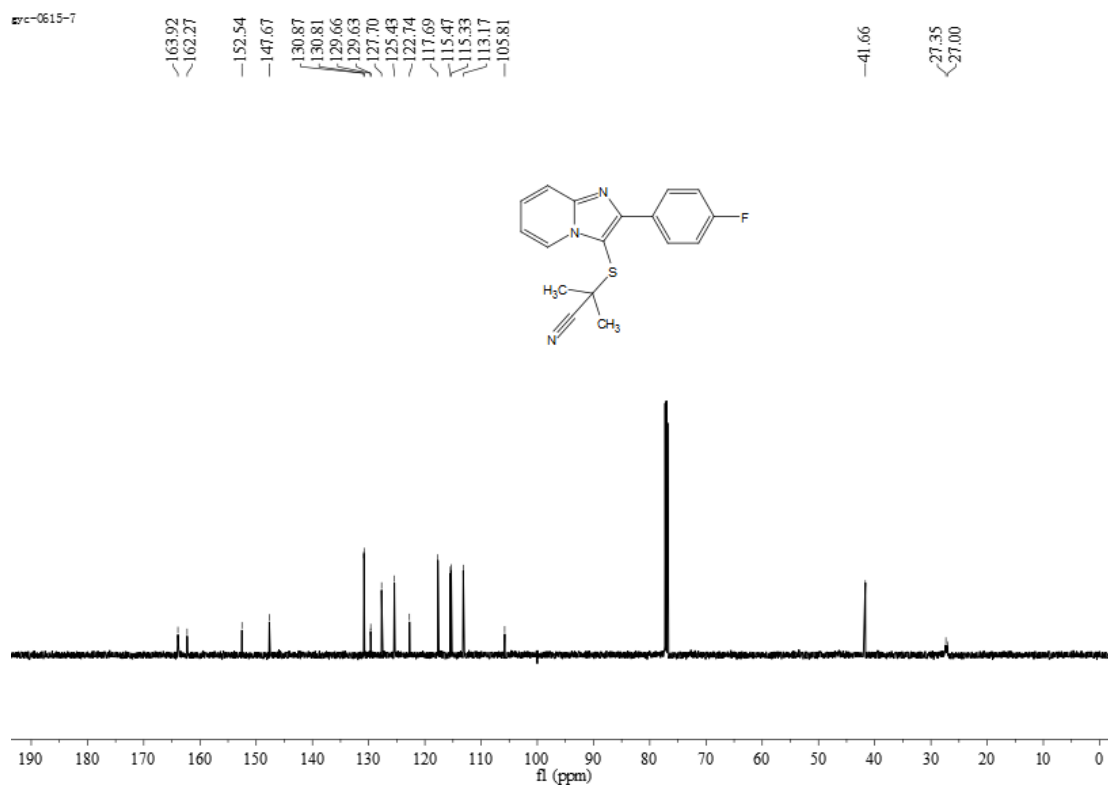

2-(2-(4-chlorophenyl)imidazo[1,2-a]pyridin-3-ylthio)-2-methylpropanenitrile (7)

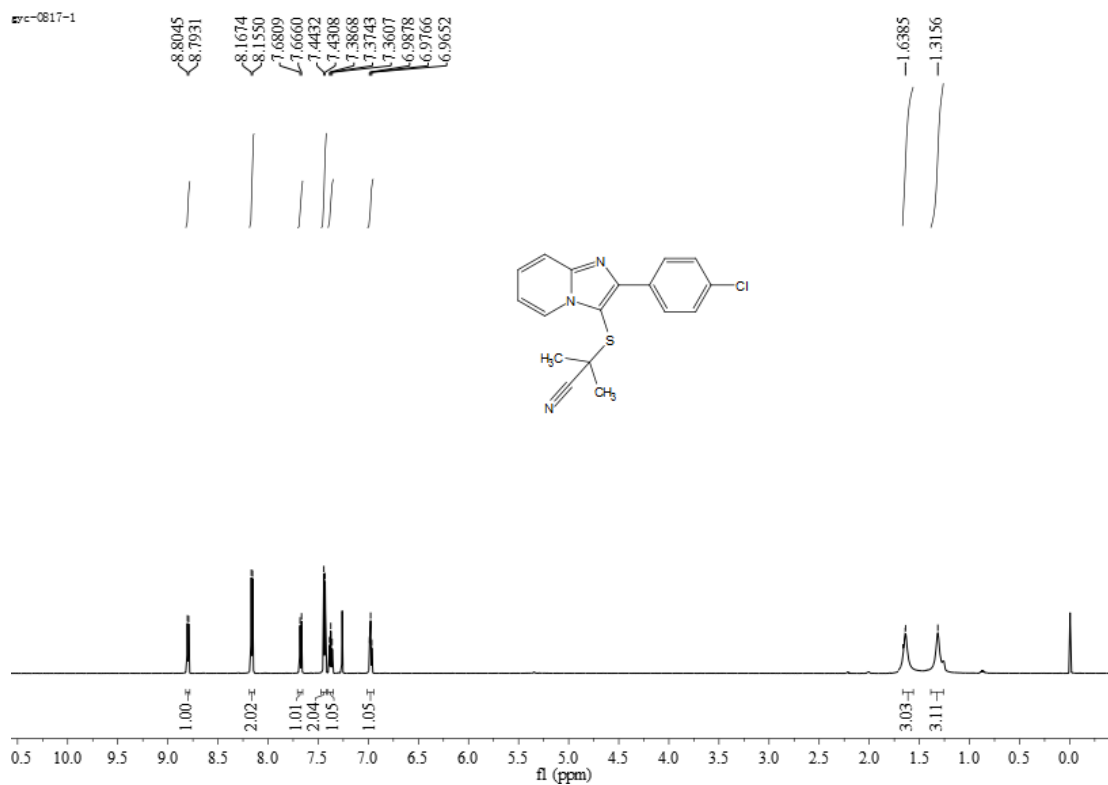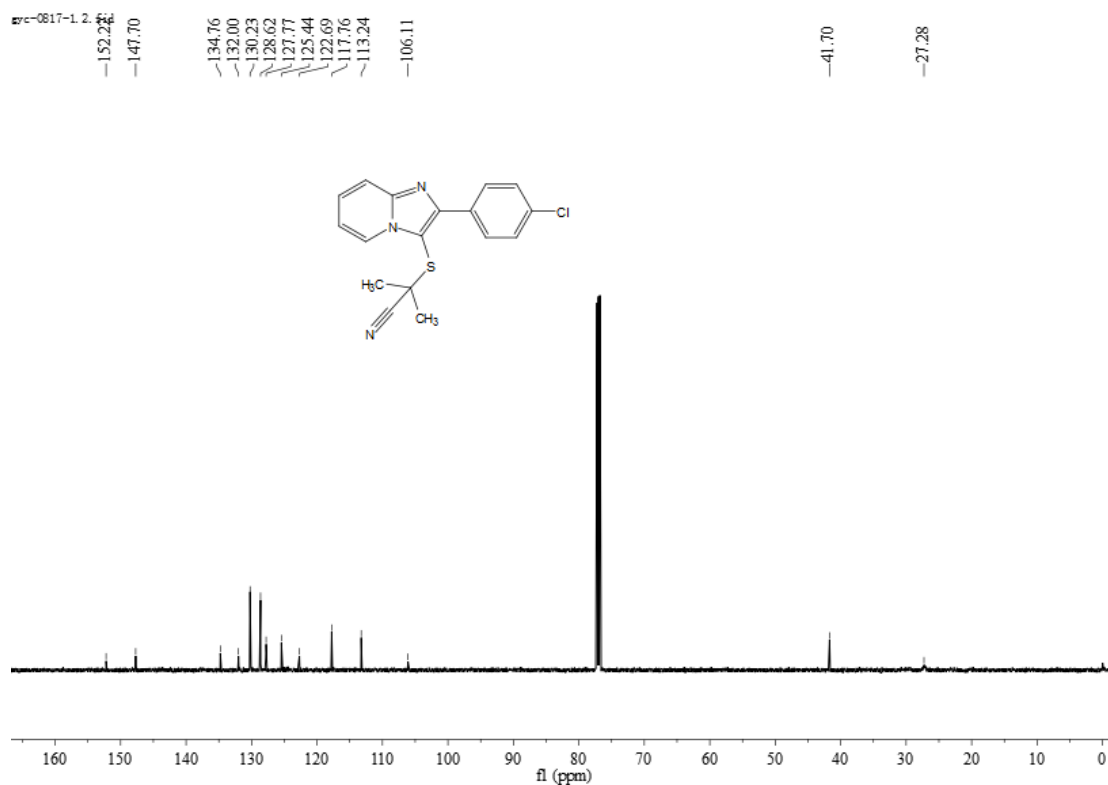



4-(3-((2-cyanopropan-2-yl)thio)imidazo[1,2-a]pyridin-2-yl)benzonitrile(8)

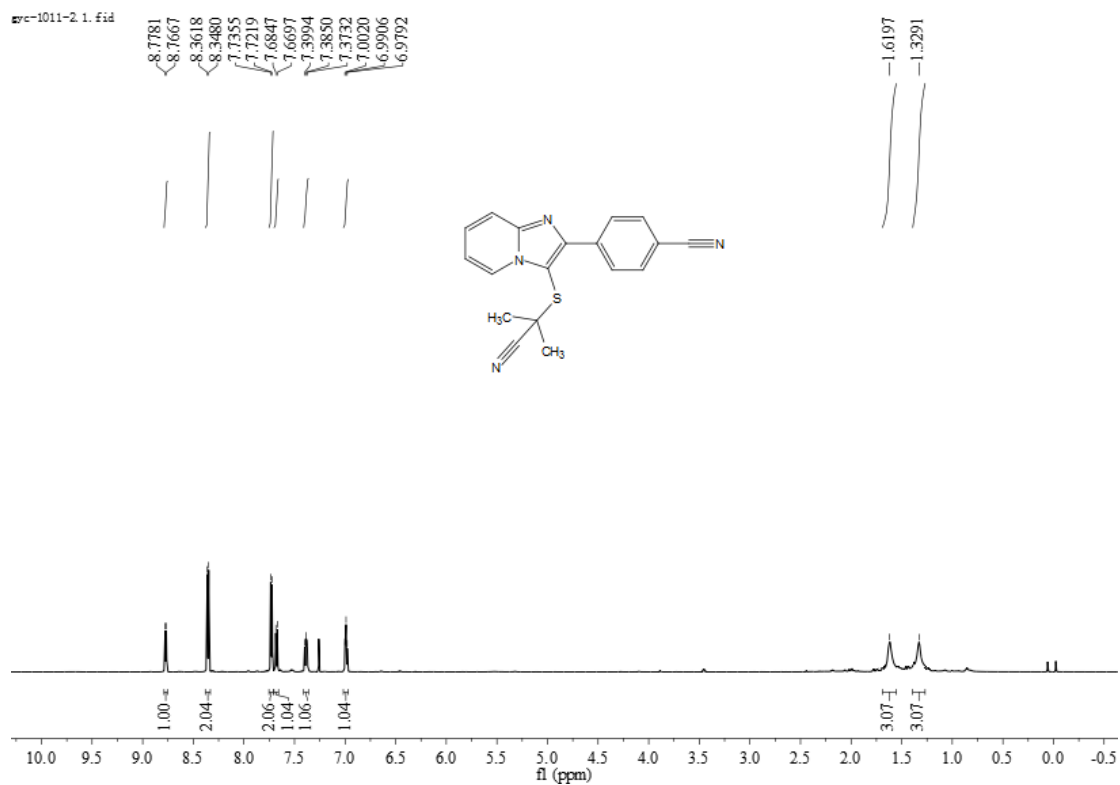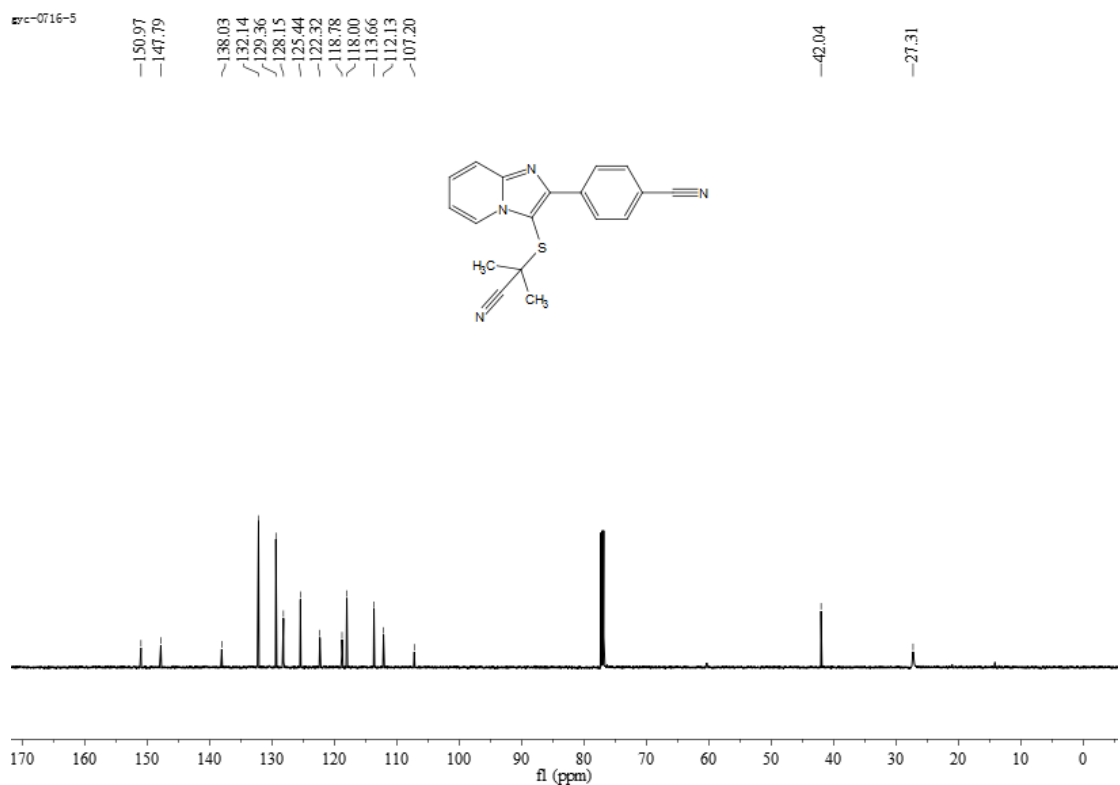

**2-methyl-2-((8-methyl-2-phenylimidazo[1,2-a]pyridin-3-yl)thio)propanenitrile (9)**

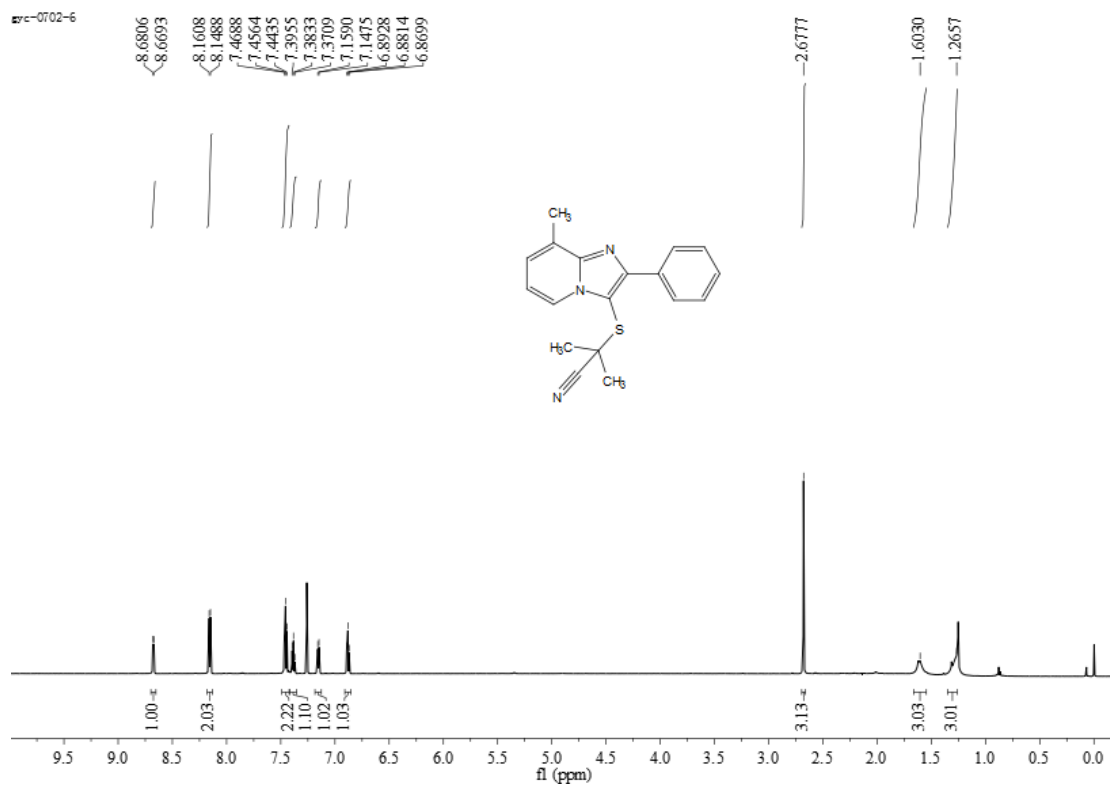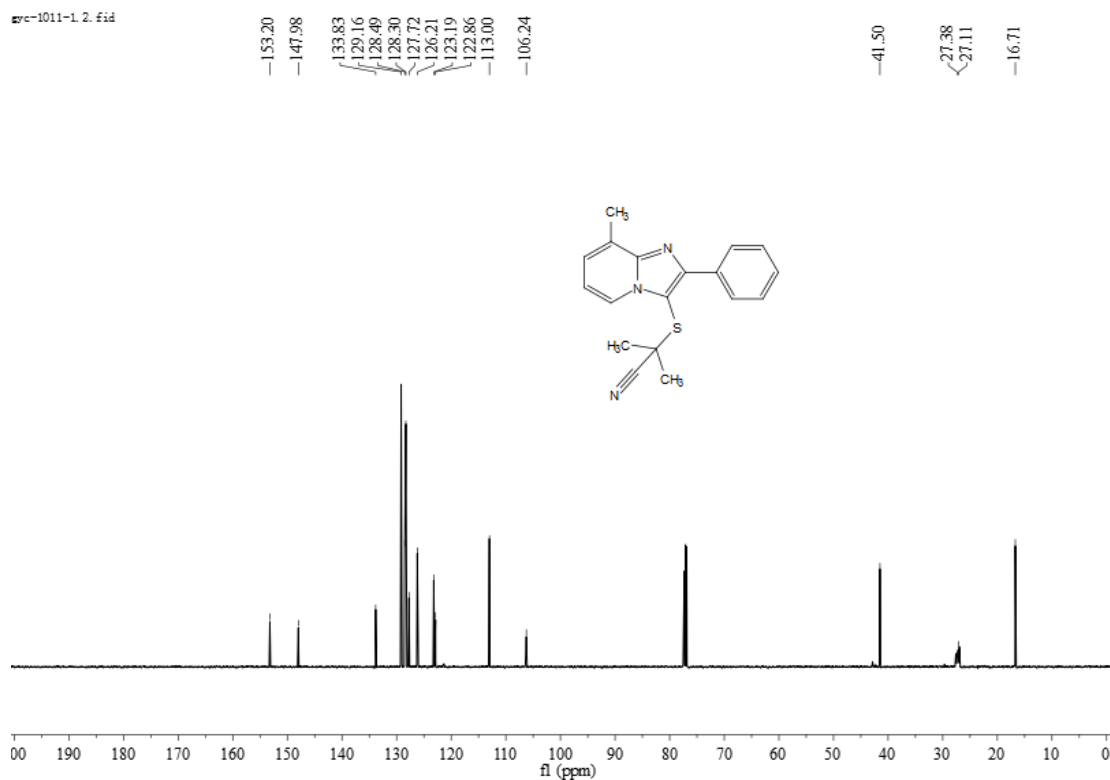

2-((8-(hydroxymethyl)-2-phenylimidazo[1,2-a]pyridin-3-yl)thio)-2-methylpropanenitrile (10)

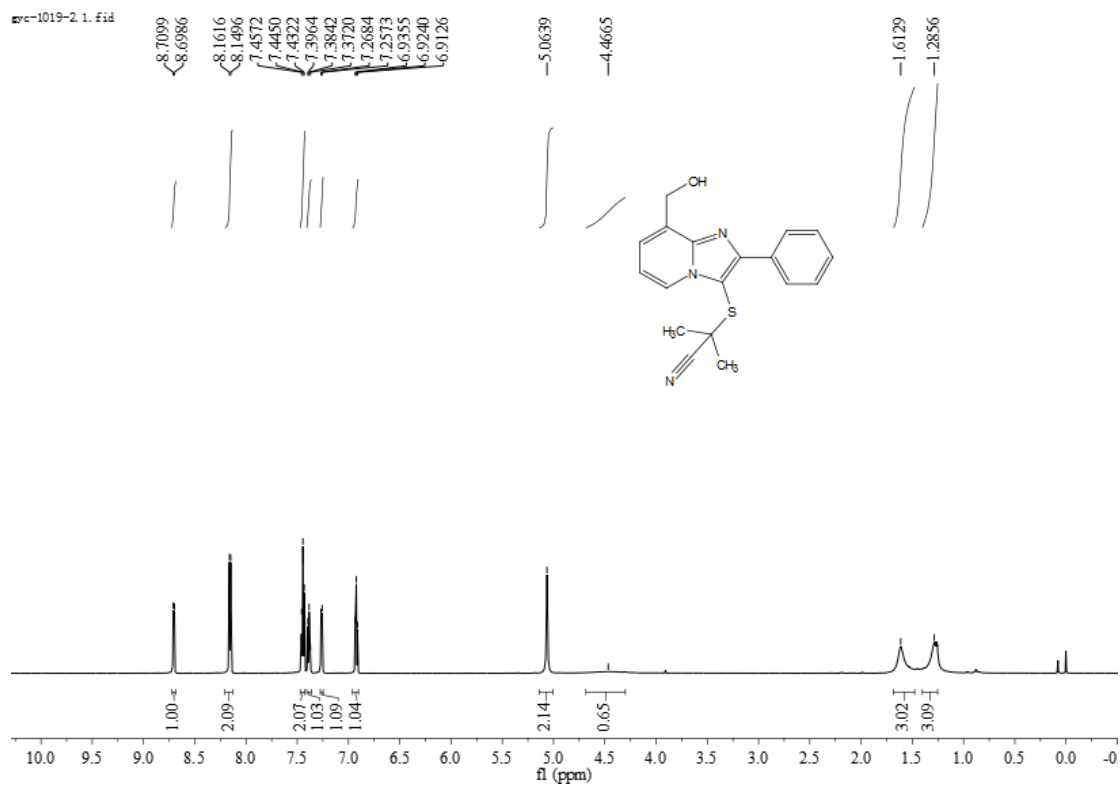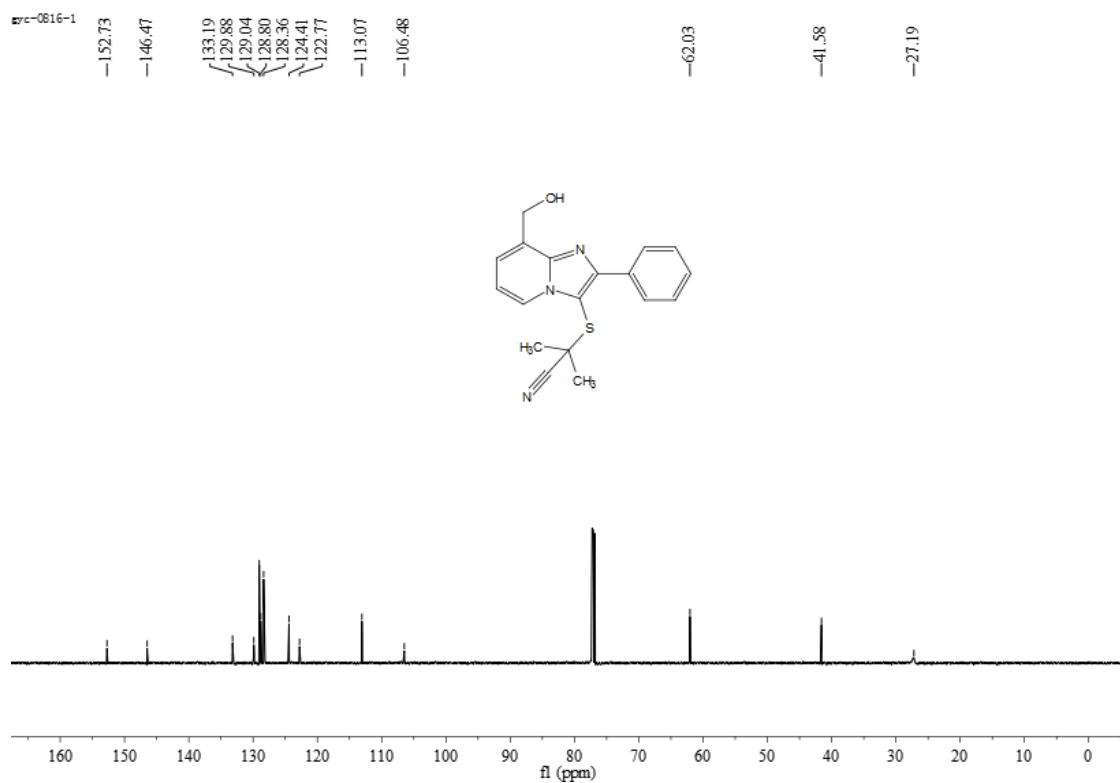

2-methyl-2-((6-methyl-2-(p-tolyl)imidazo[1,2-a]pyridin-3-yl)thio)propanenitrile (11)

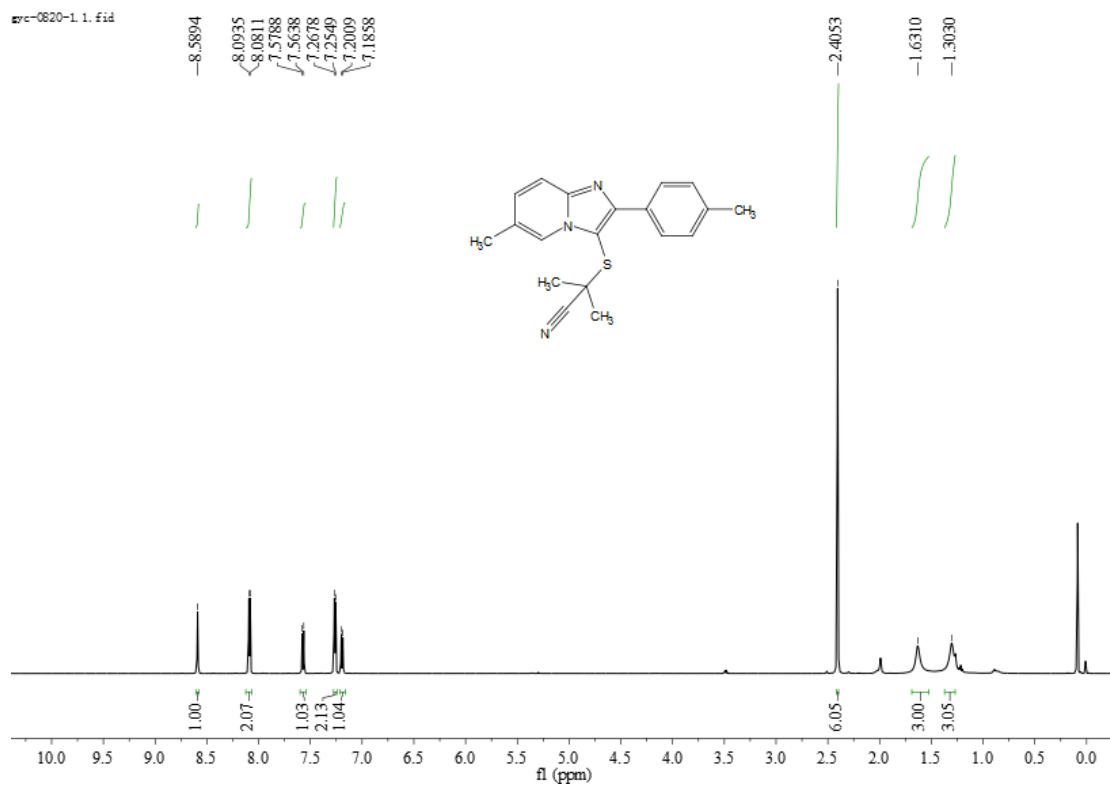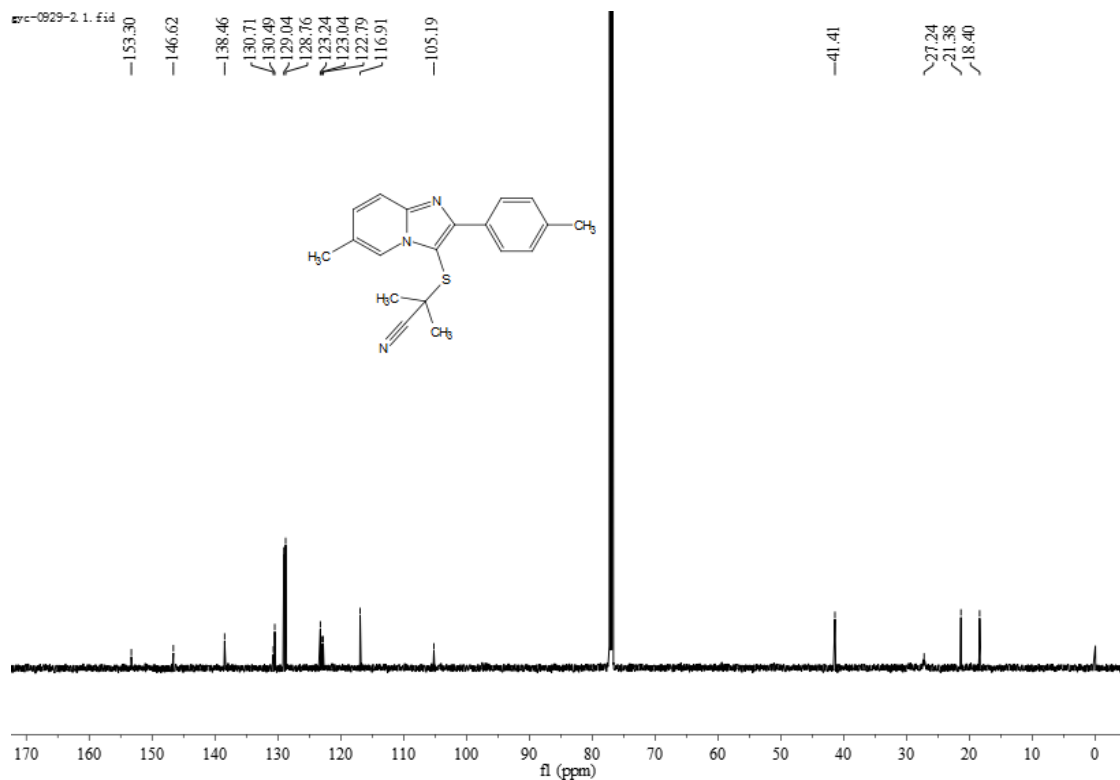

**2-((2-(4-methoxyphenyl)-7-methylimidazo[1,2-a]pyridin-3-yl)thio)-2-methylpropanenitrile**  
(12)

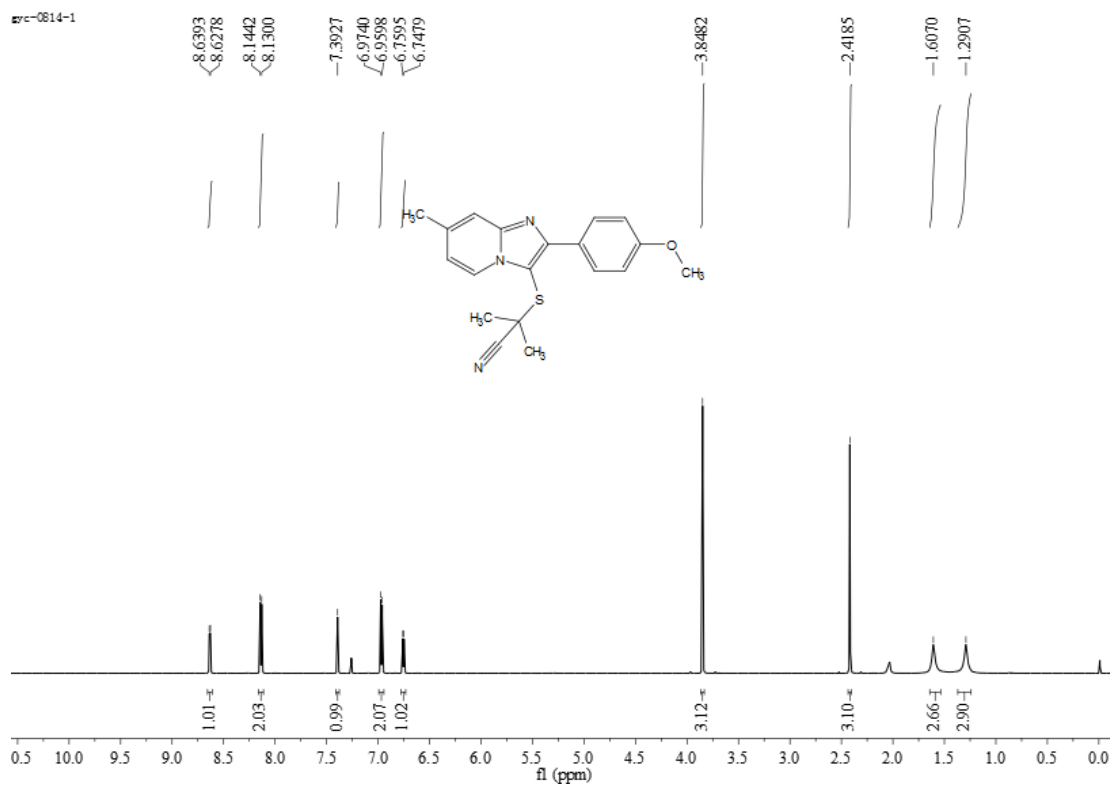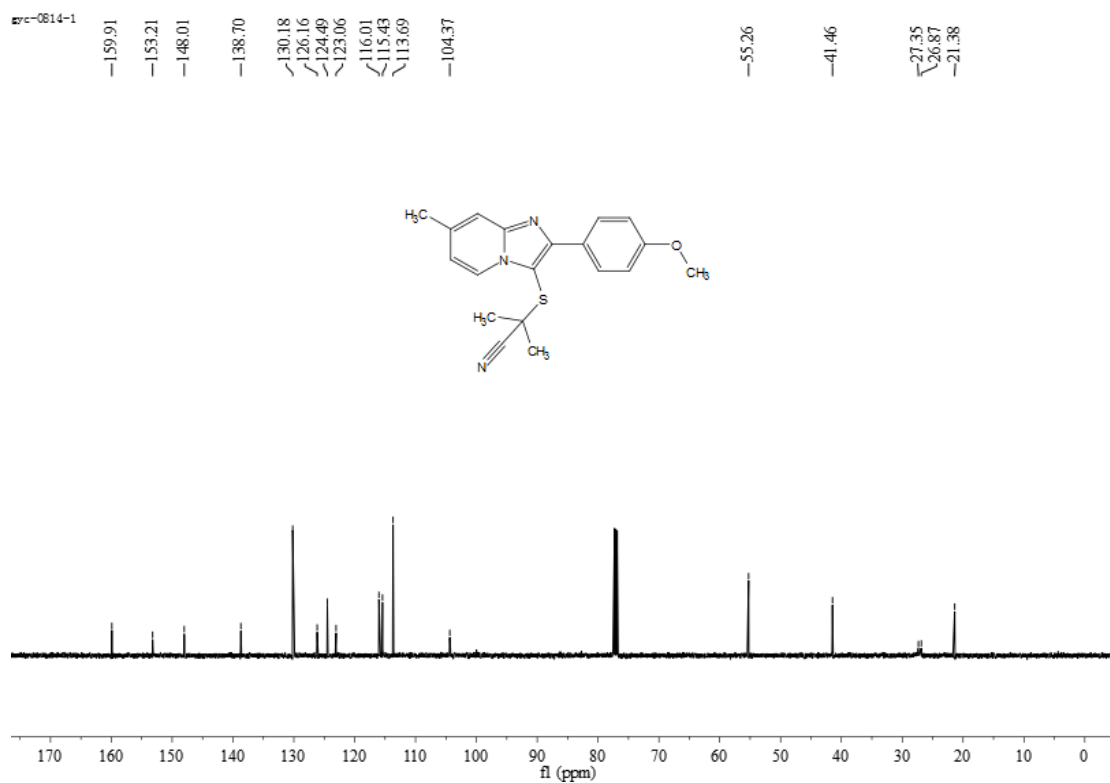

2-((6-methoxy-2-(4-methoxyphenyl)imidazo[1,2-a]pyridin-3-yl)thio)-2-methylpropanenitrile  
(13)

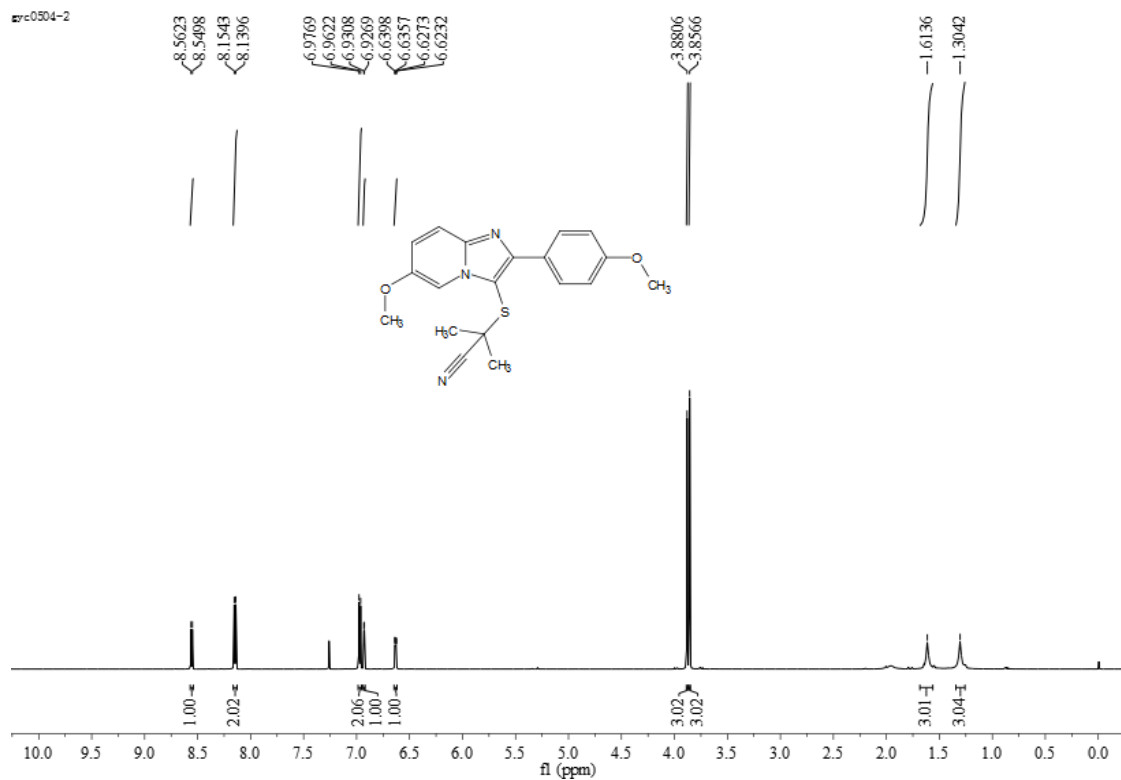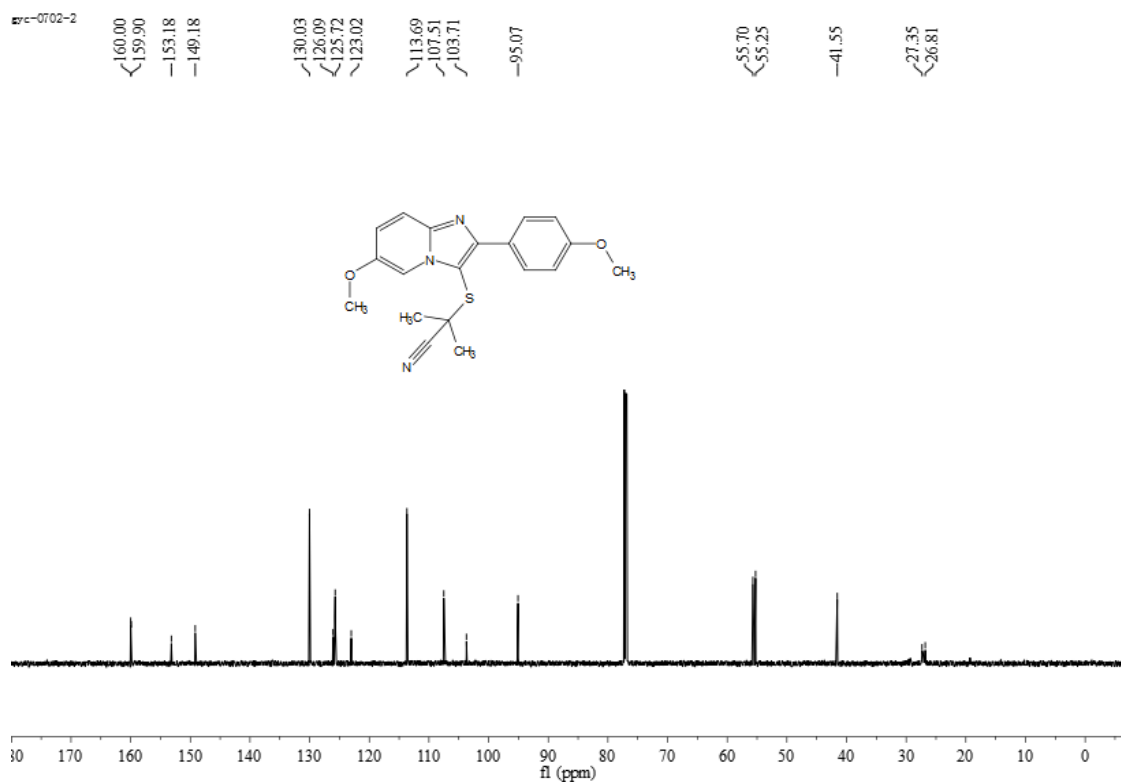

2-((2-(4-chlorophenyl)-6-methoxyimidazo[1,2-a]pyridin-3-yl)thio)-2-methylpropanenitrile  
(14)

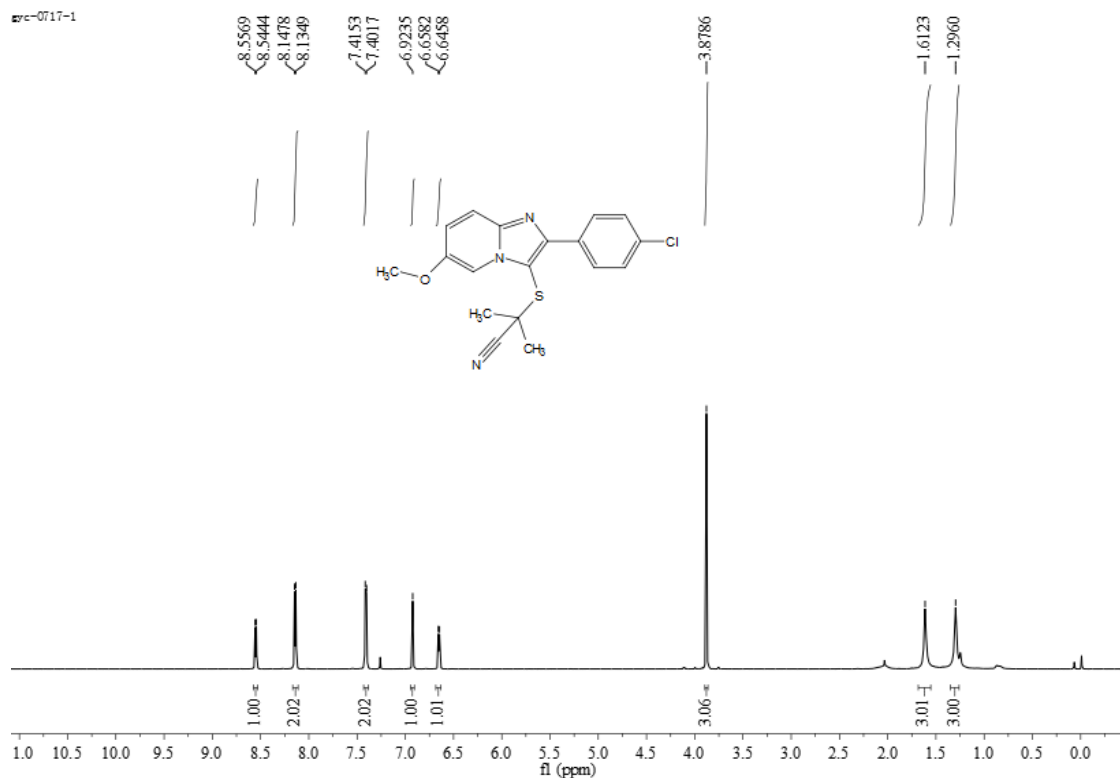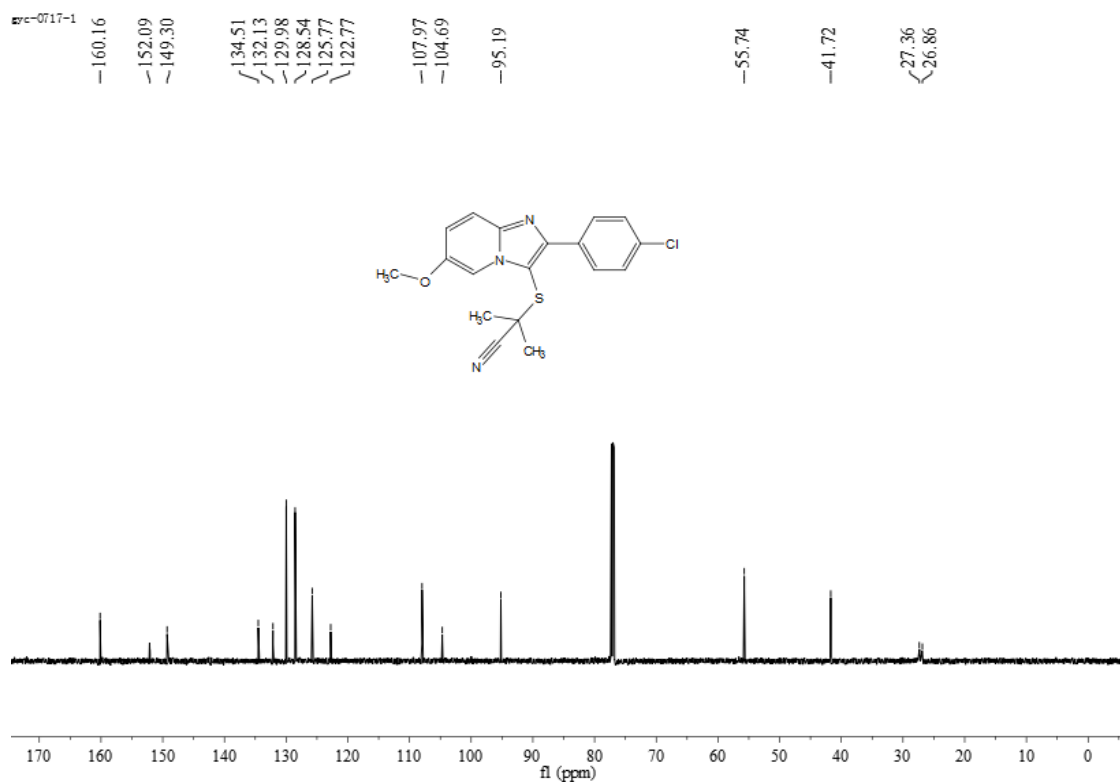

2-((2-(2-hydroxyphenyl)imidazo[1,2-a]pyridin-3-yl)thio)-2-methylpropanenitrile (15)

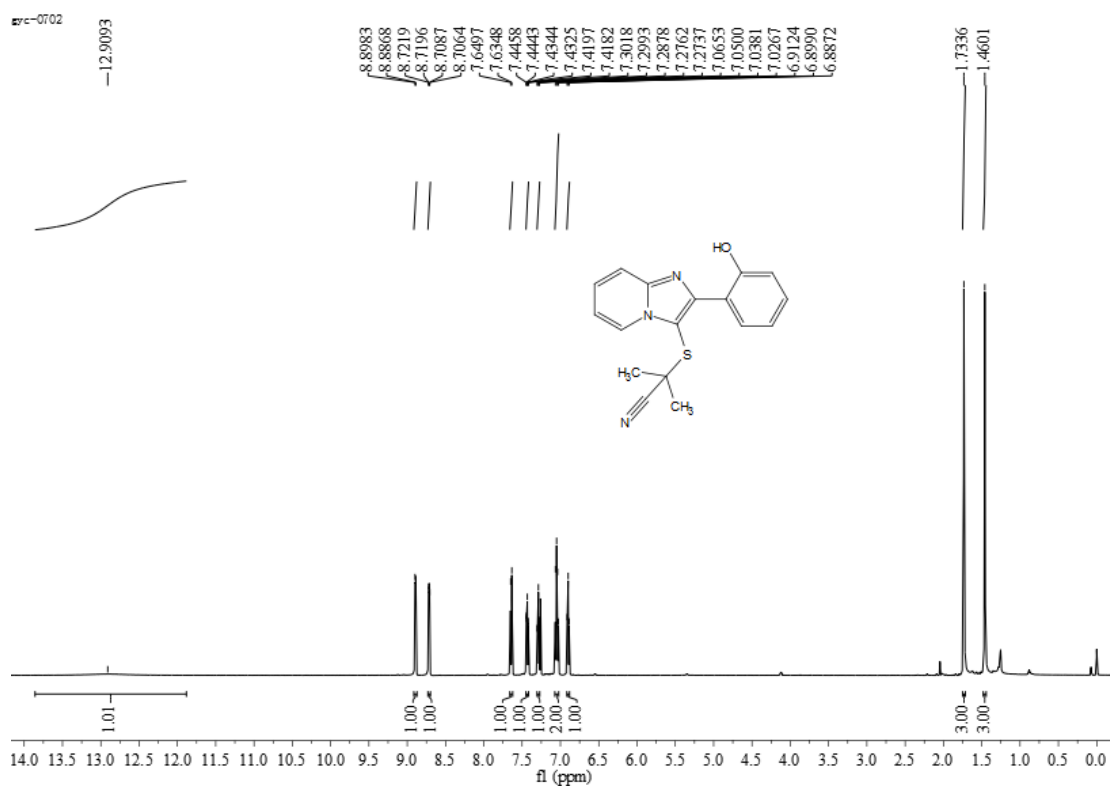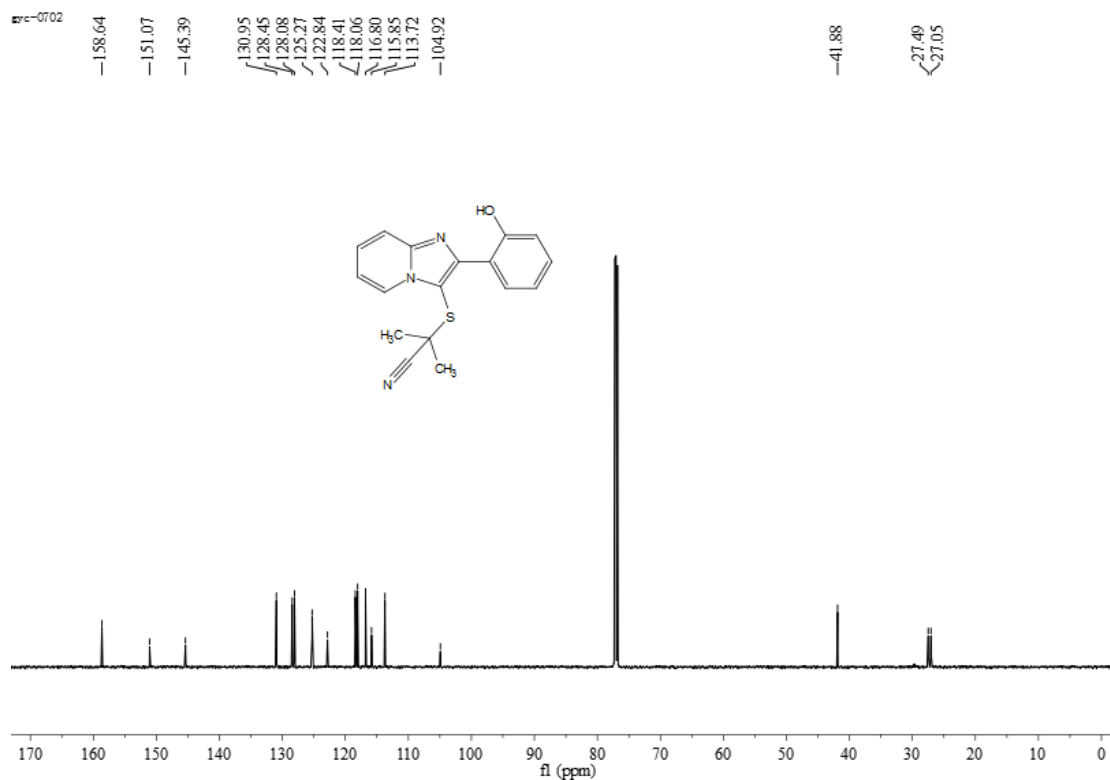



2-((2-(2-hydroxyphenyl)imidazo[1,2-a]pyridin-3-yl)thio)-2-methylbutanenitrile (16)

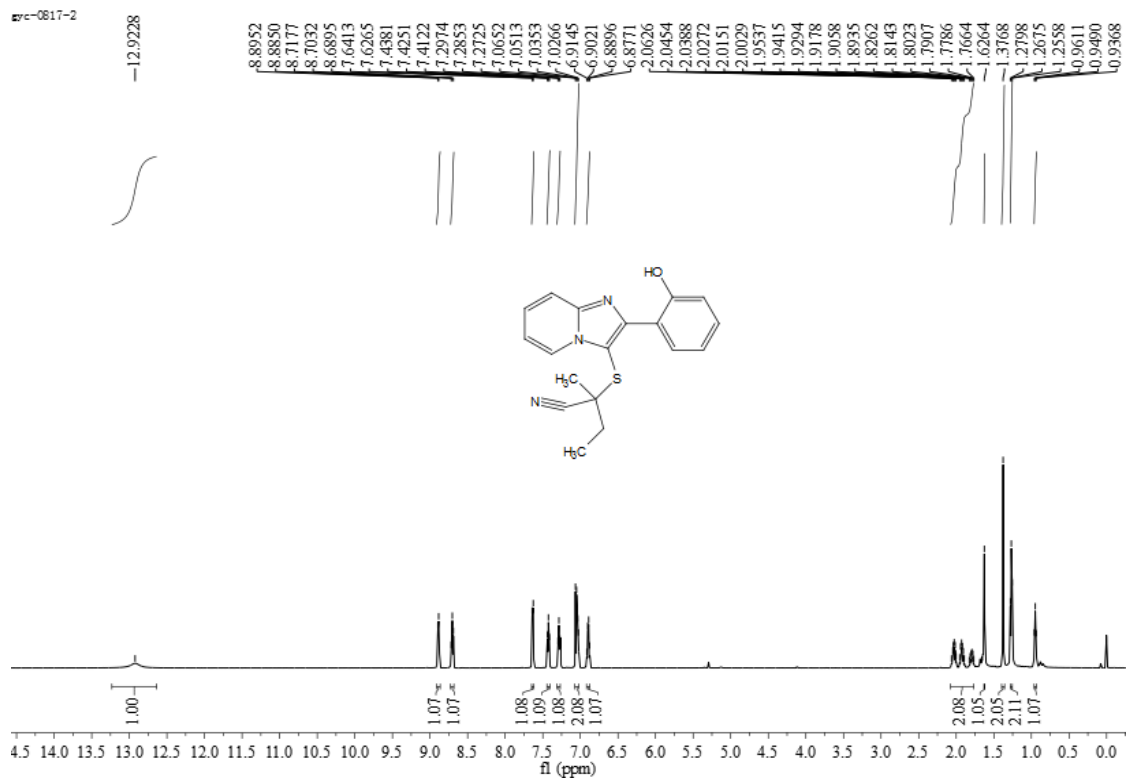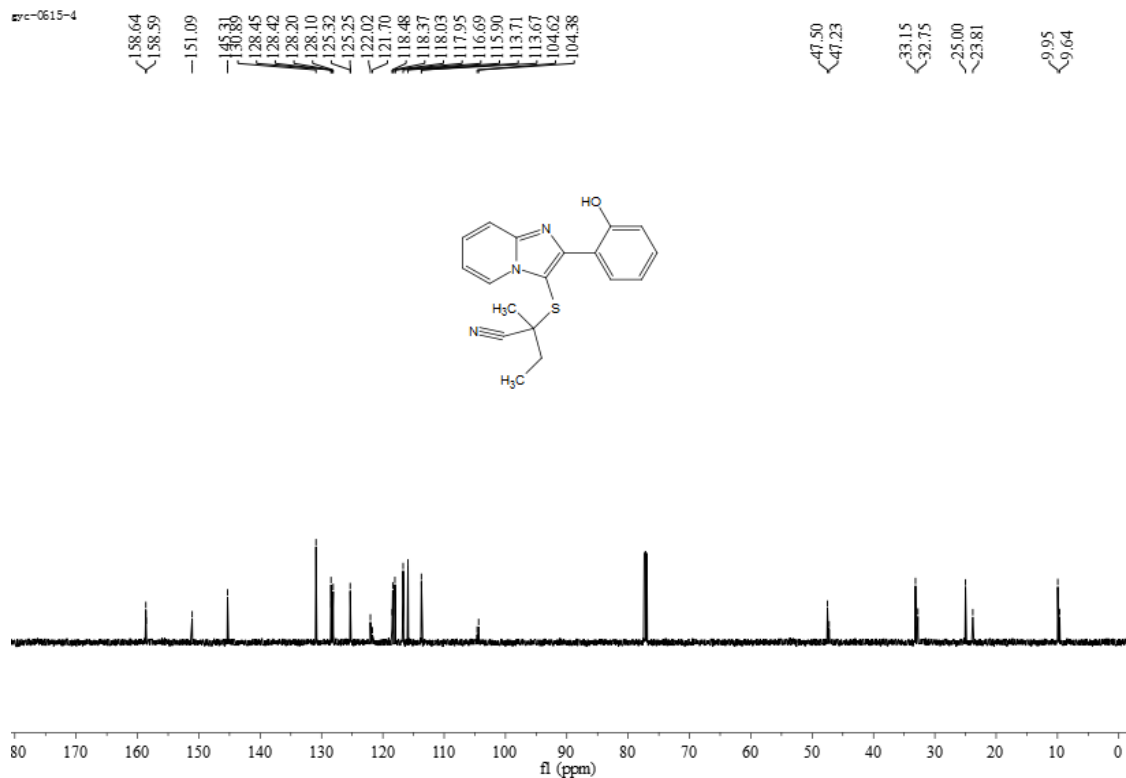

2-((2-(2-hydroxyphenyl)imidazo[1,2-a]pyridin-3-yl)thio)-2,4-dimethylpentanenitrile (17)

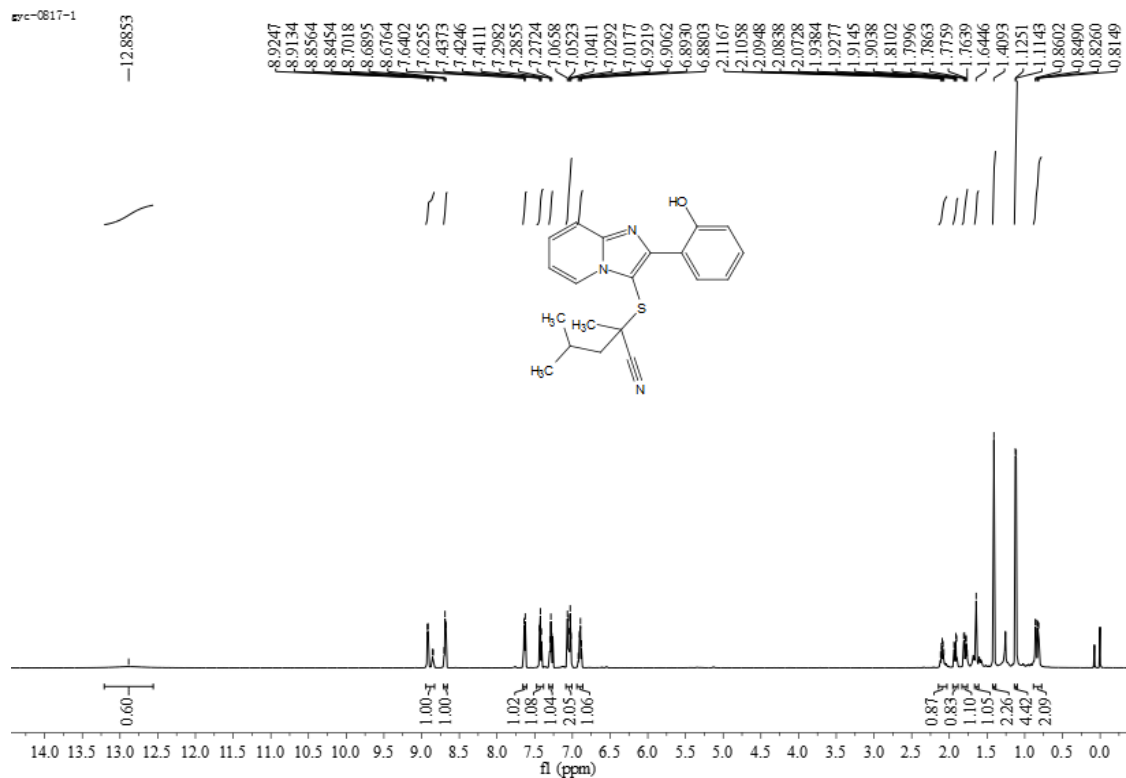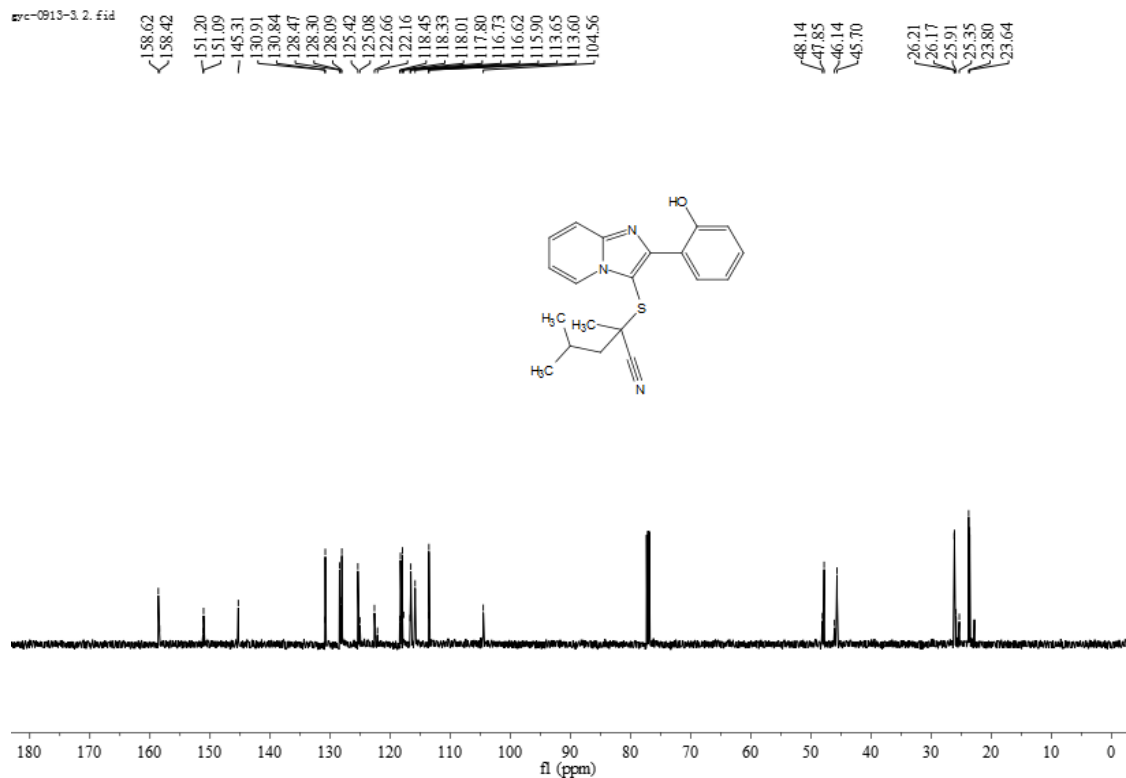

methyl 2-((2-(2-hydroxyphenyl)imidazo[1,2-a]pyridin-3-yl)thio)-2-methylpropanoate (18)

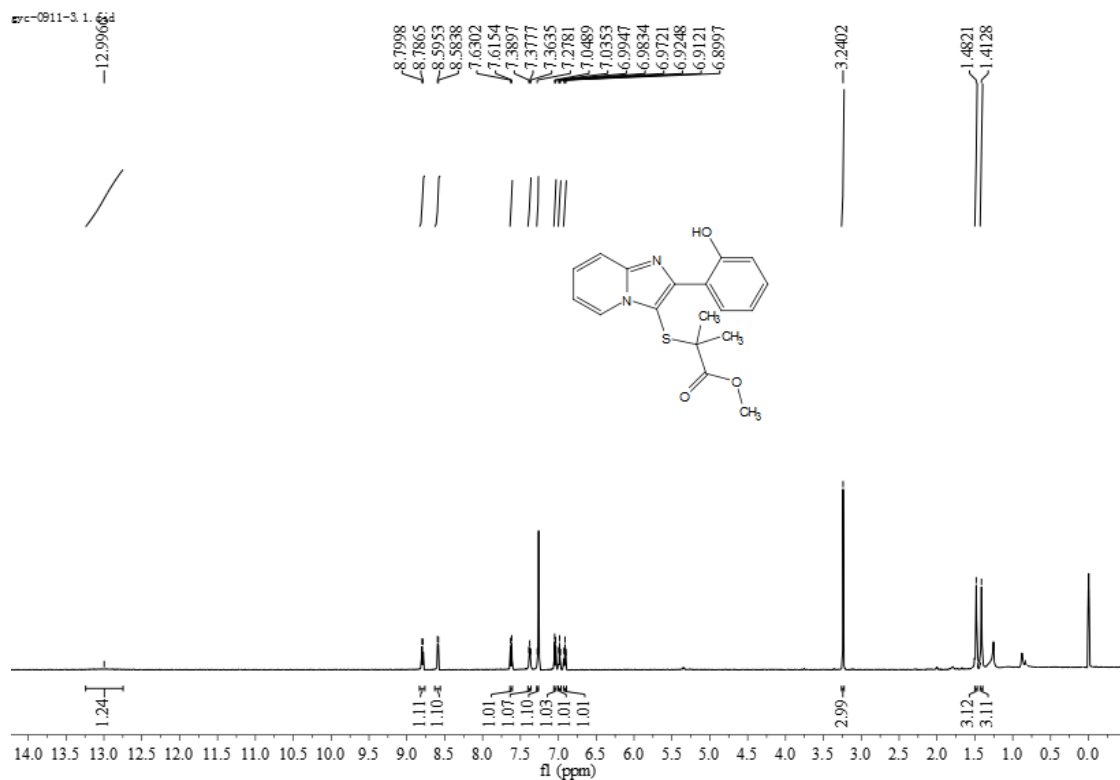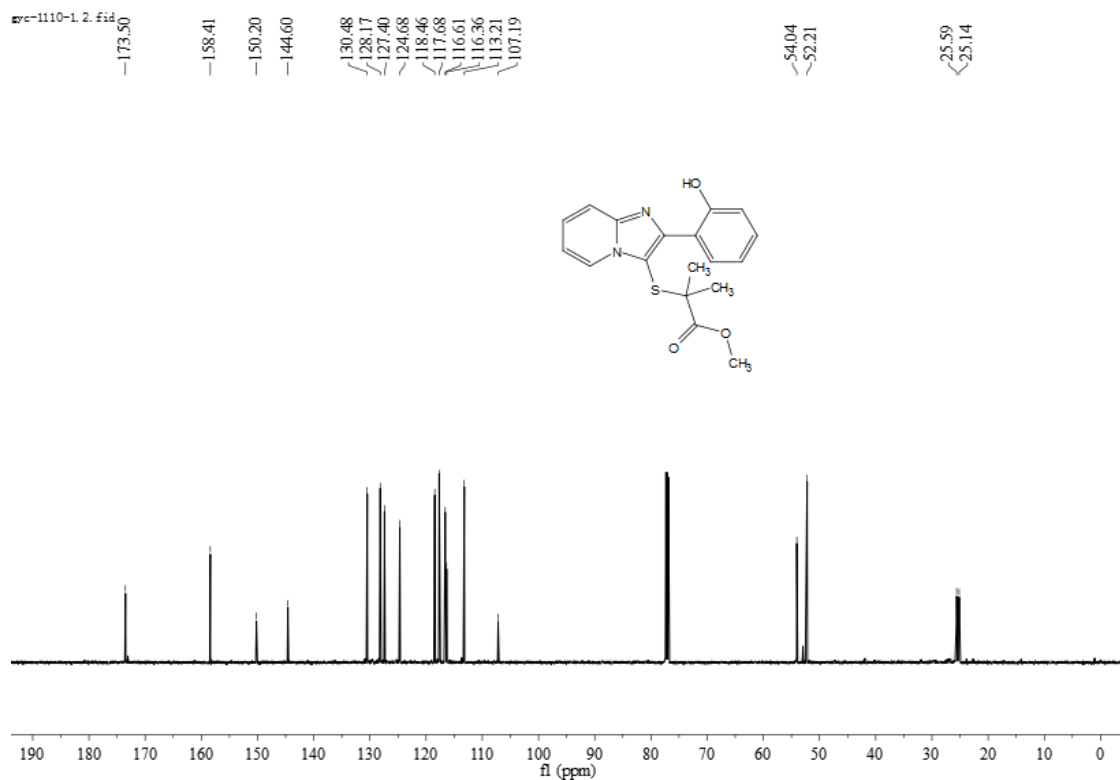

**methyl 2-methyl-2-((2-phenylimidazo[1,2-a]pyridin-3-yl)thio)propanoate (19)**

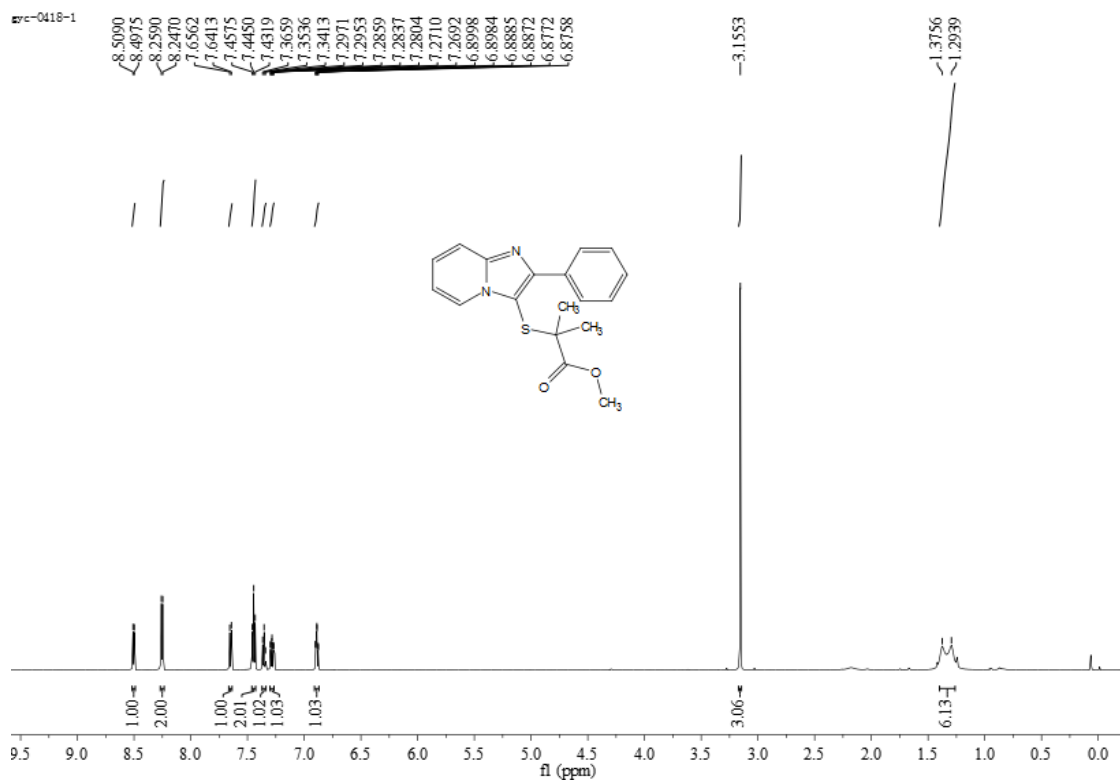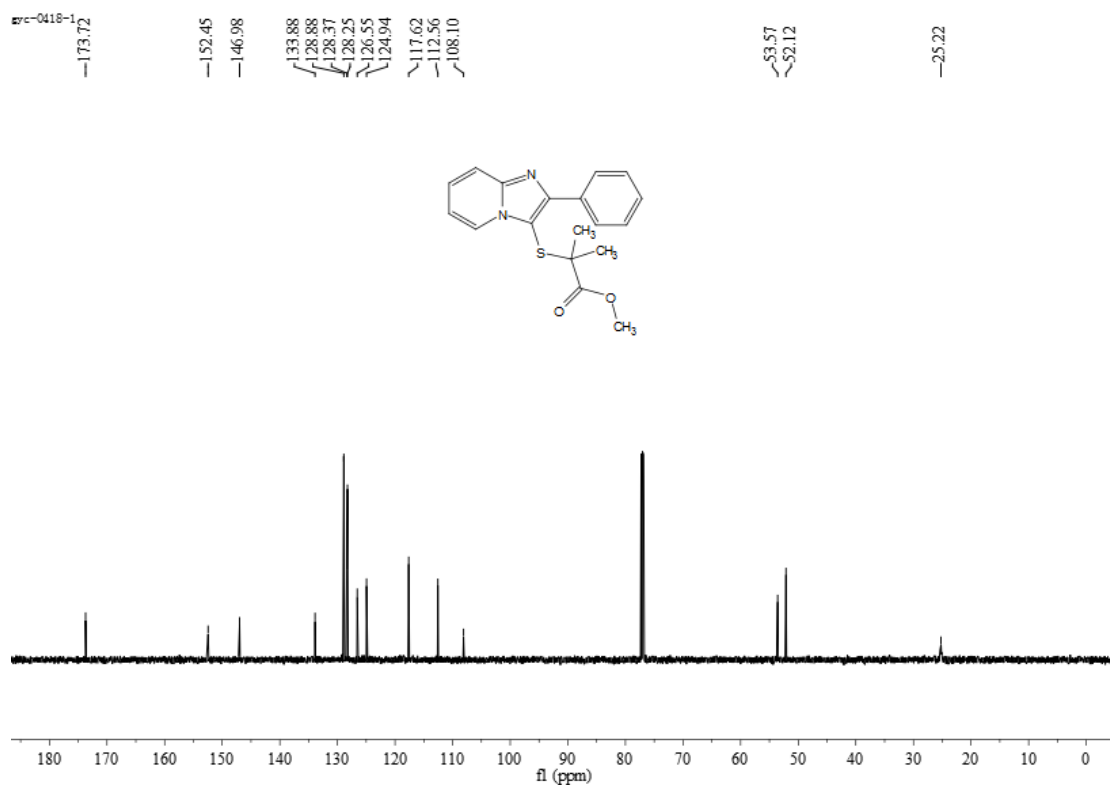

1-((2-phenylimidazo[1,2-a]pyridin-3-yl)thio)cyclohexane-1-carbonitrile (20)

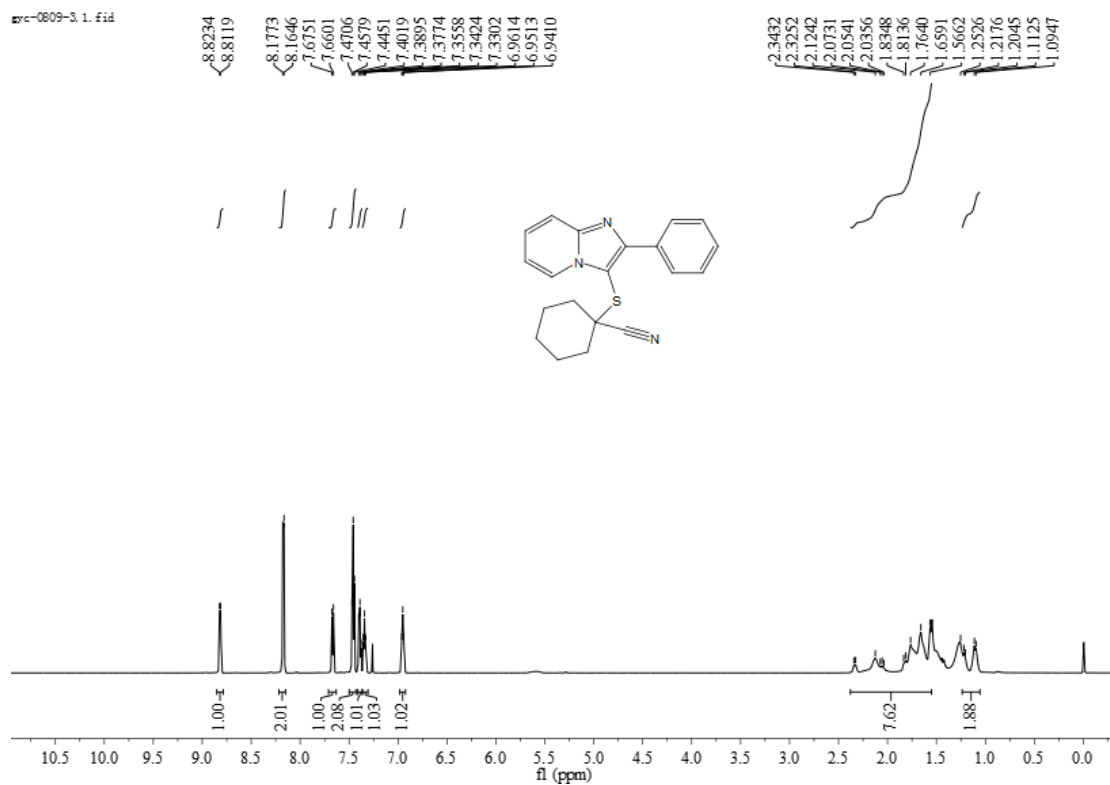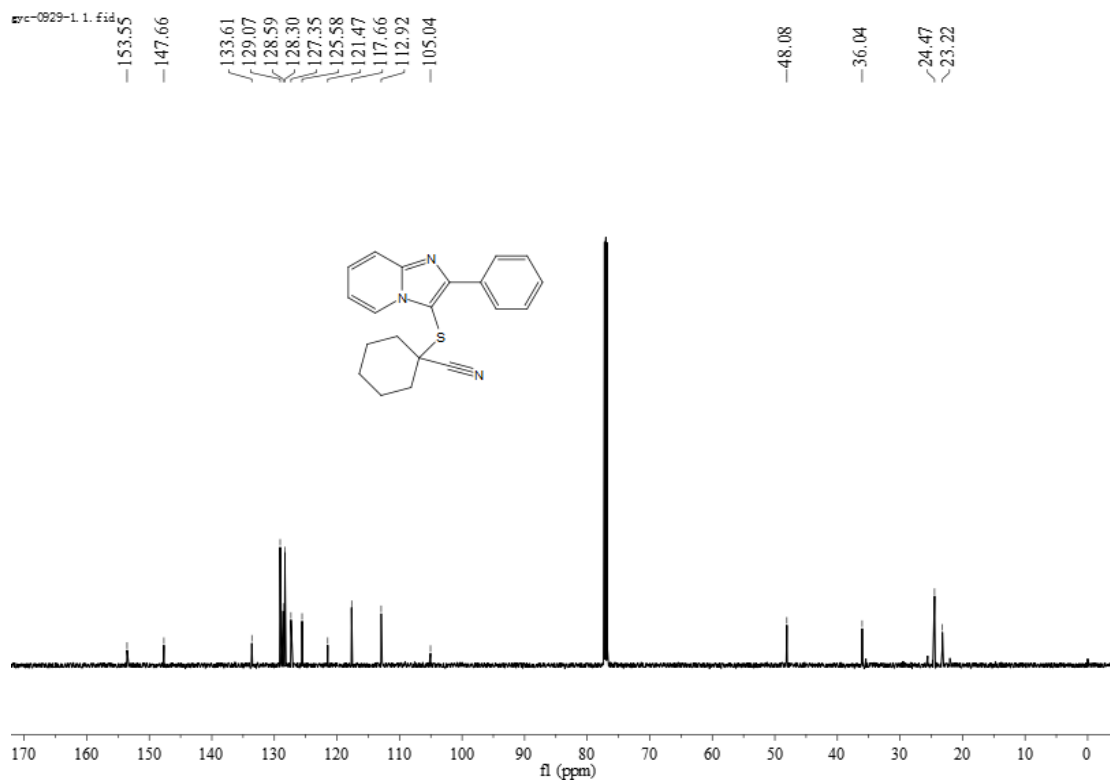

**2-methyl-2-((2-phenylimidazo[1,2-a]pyridin-3-yl)thio)butanenitrile (21)**

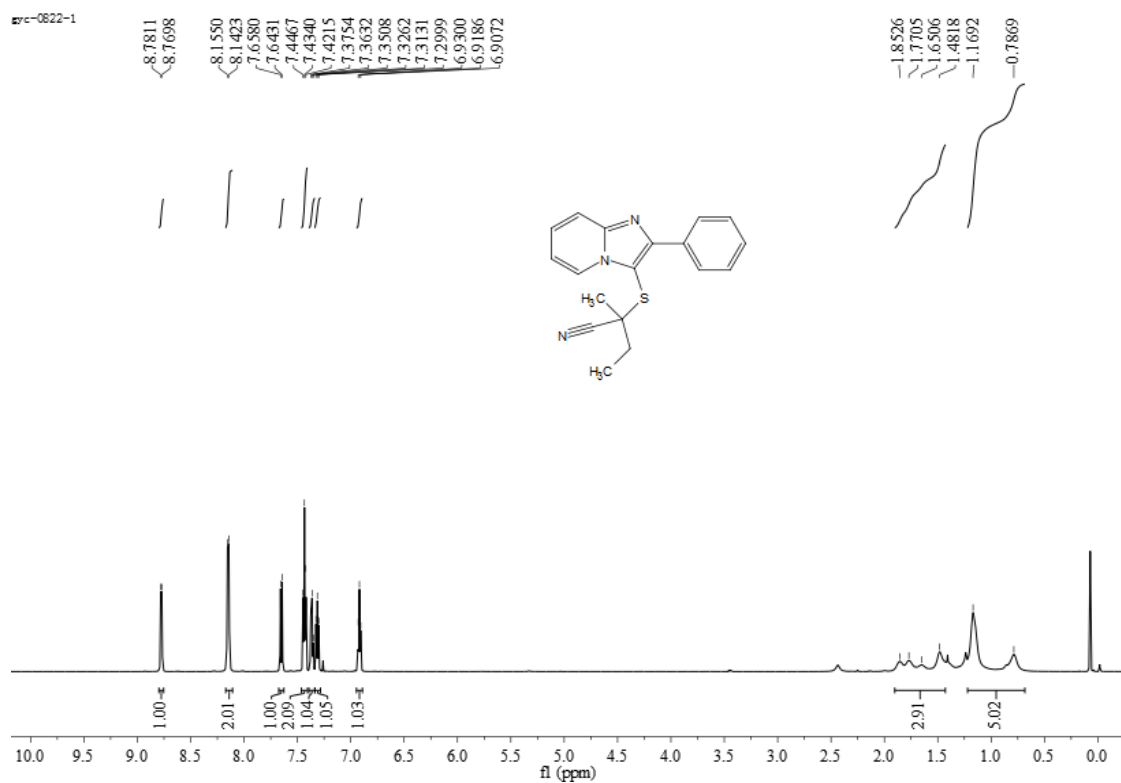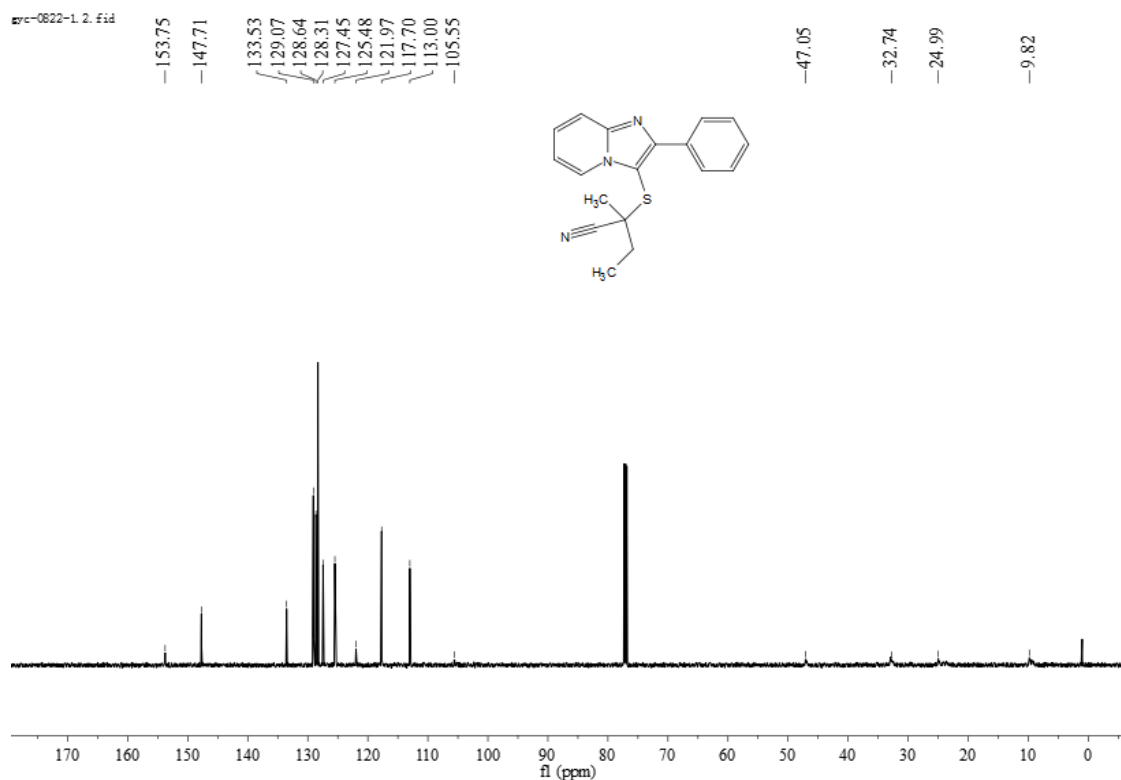

**2,4-dimethyl-2-((2-phenylimidazo[1,2-a]pyridin-3-yl)thio)pentanenitrile (22)**

src-1019-3.1.fid

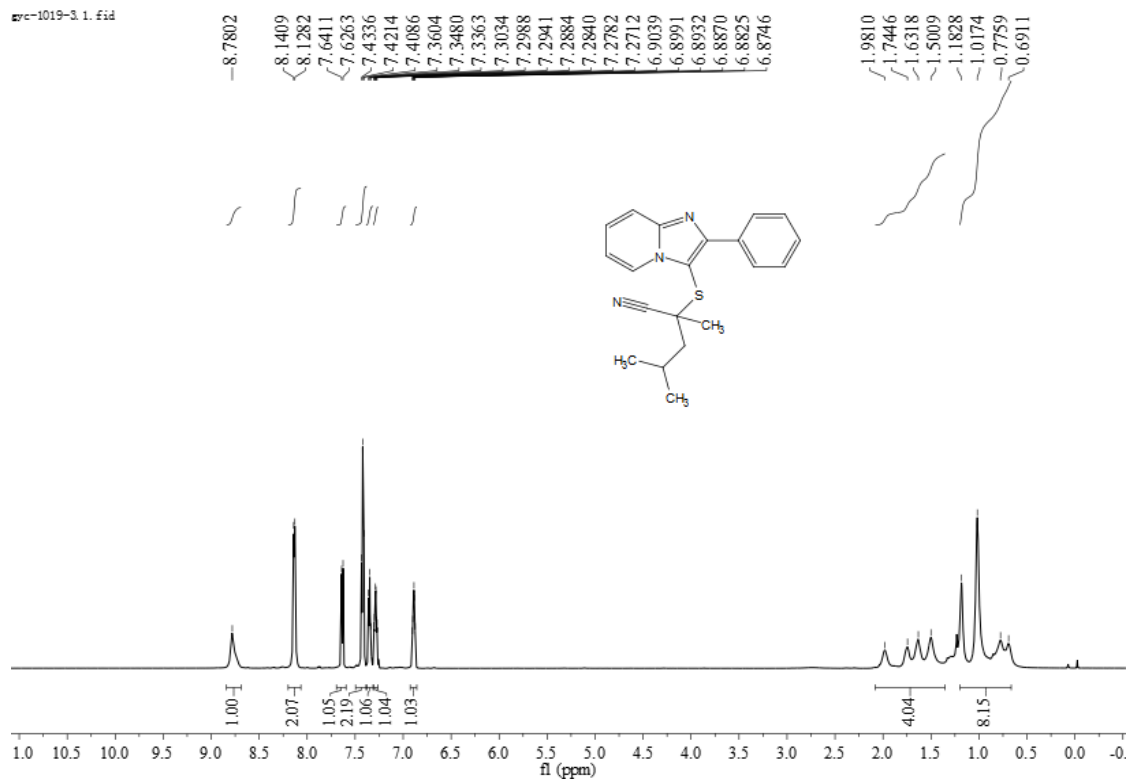

src-1019-3.2.fid

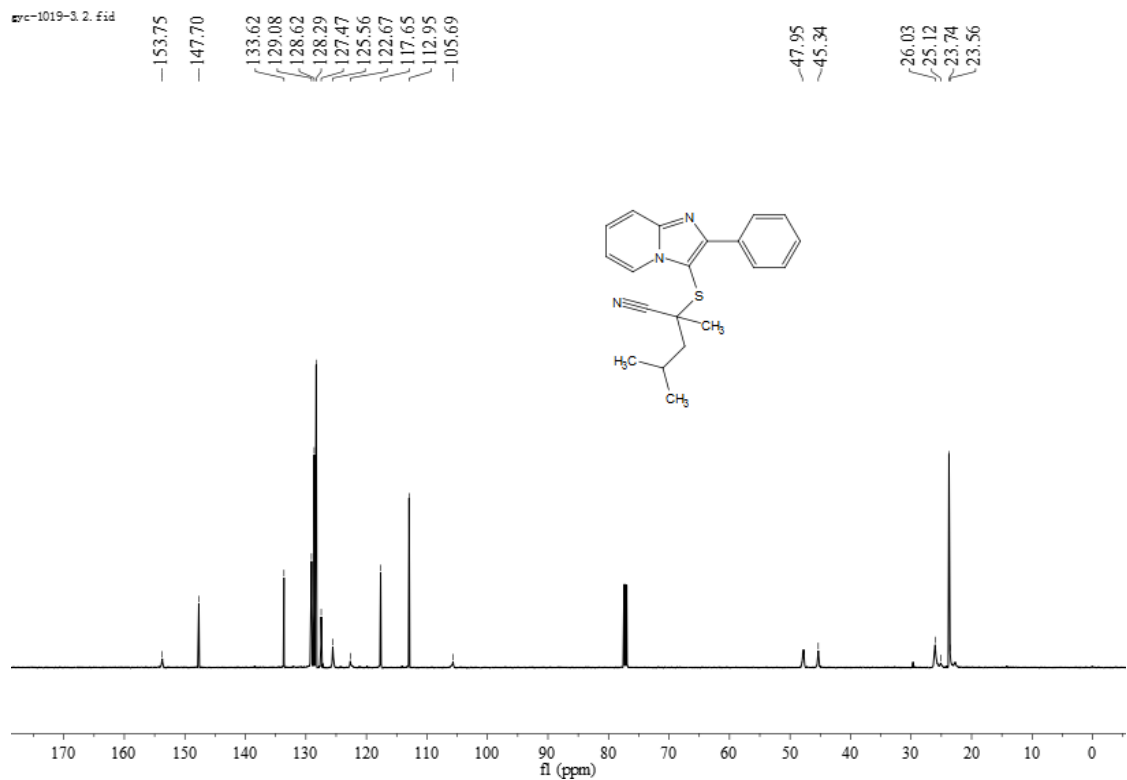

2-methyl-2-((6-phenylimidazo[2,1-b]thiazol-5-yl)thio)propanenitrile (24)

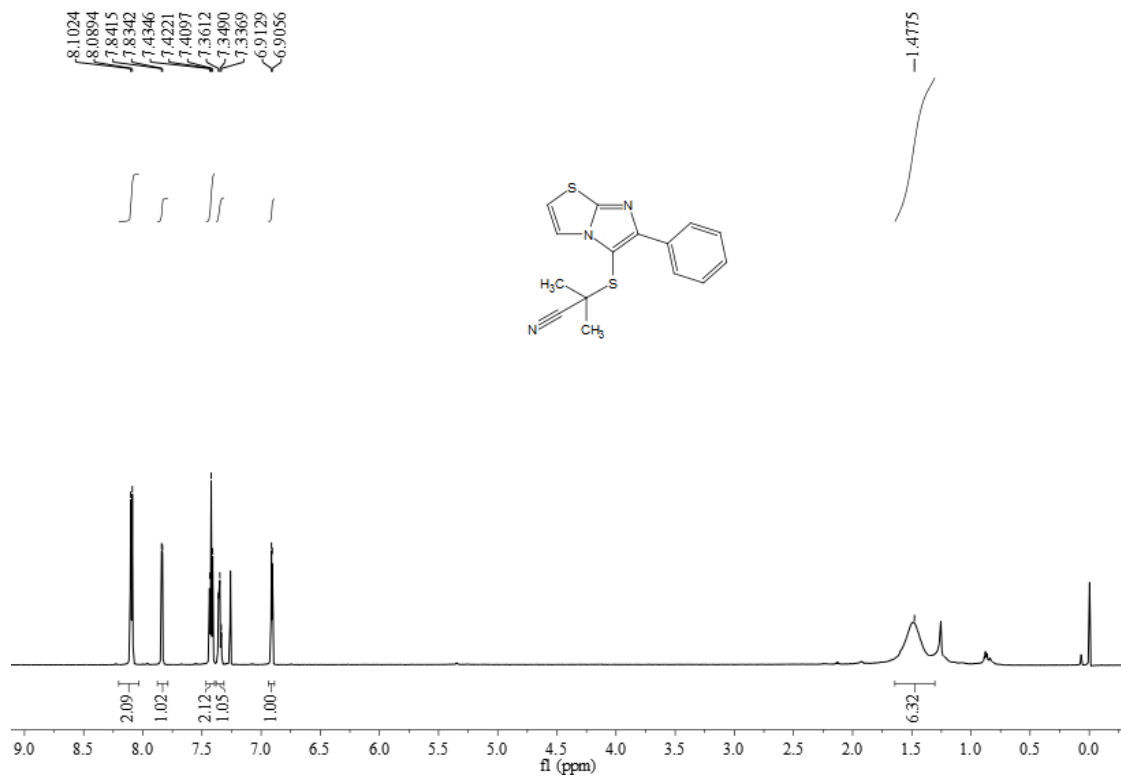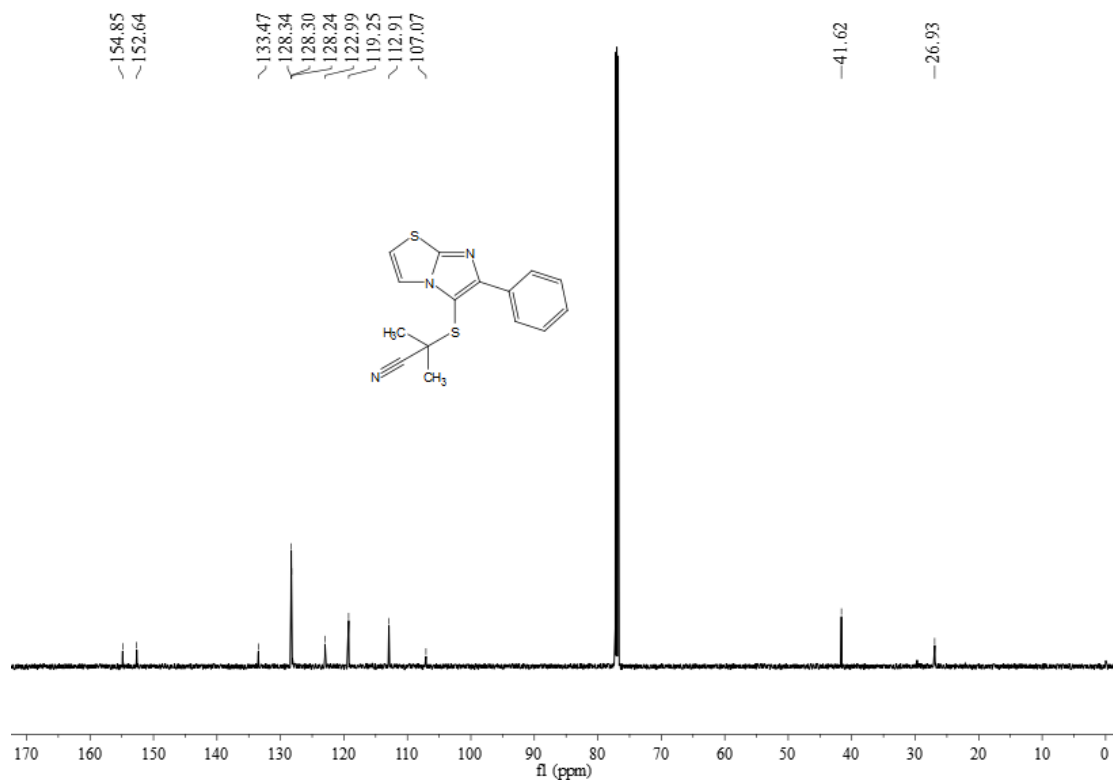



2-((6-(4-fluorophenyl)imidazo[2,1-b]thiazol-5-yl)thio)-2-methylpropanenitrile (25)

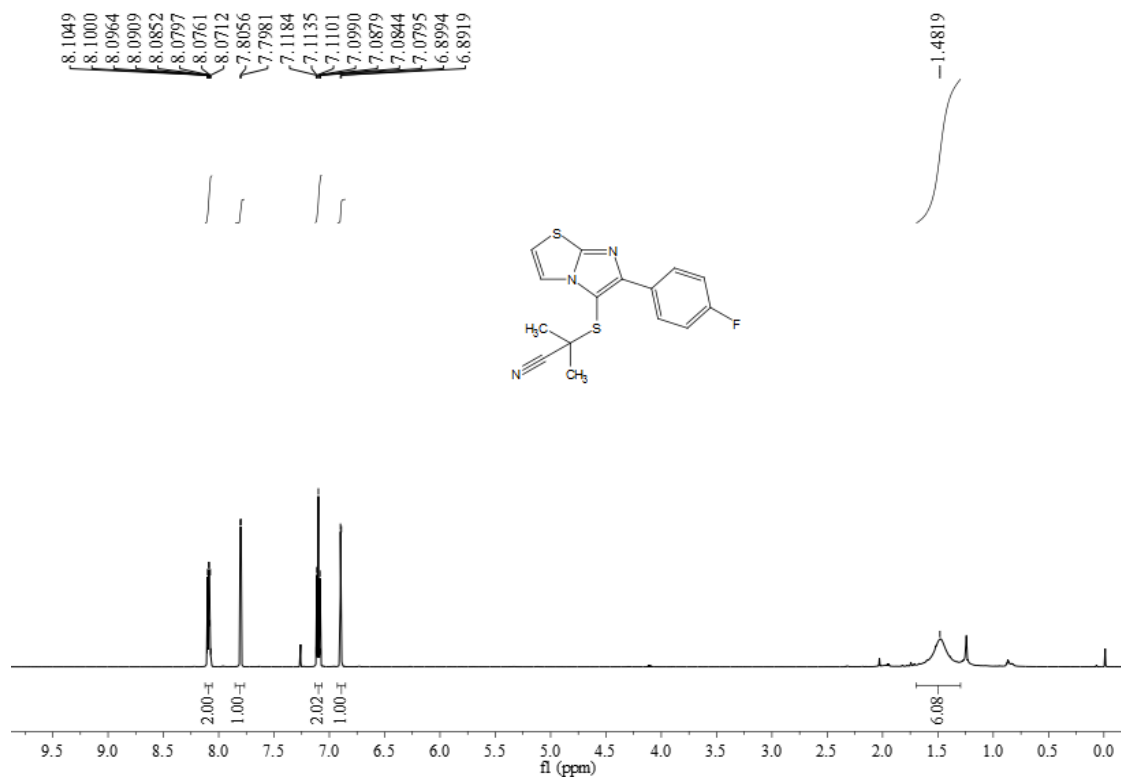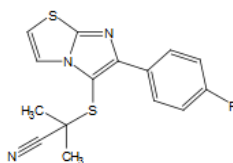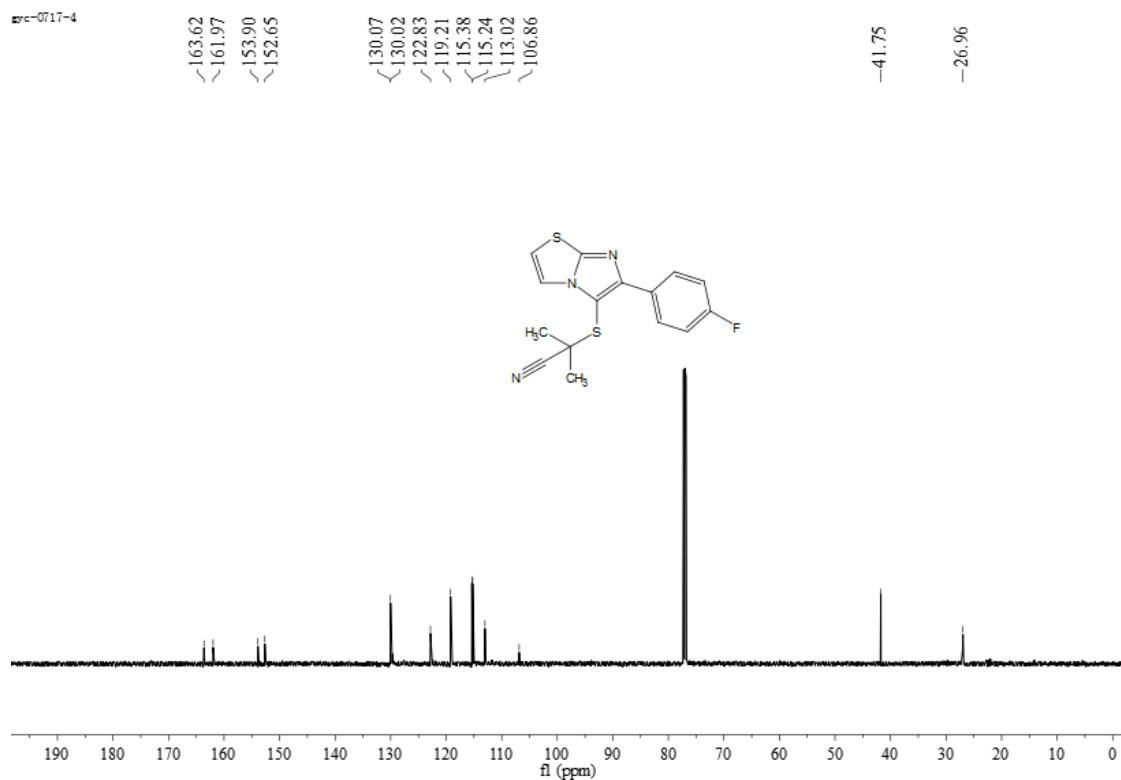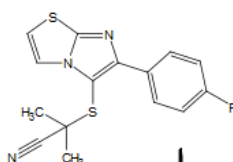

**2-methyl-2-((2-(p-tolyl)benzo[d]imidazo[2,1-b]thiazol-3-yl)thio)propanenitrile (26)**

gyc-1121-1.1.fid

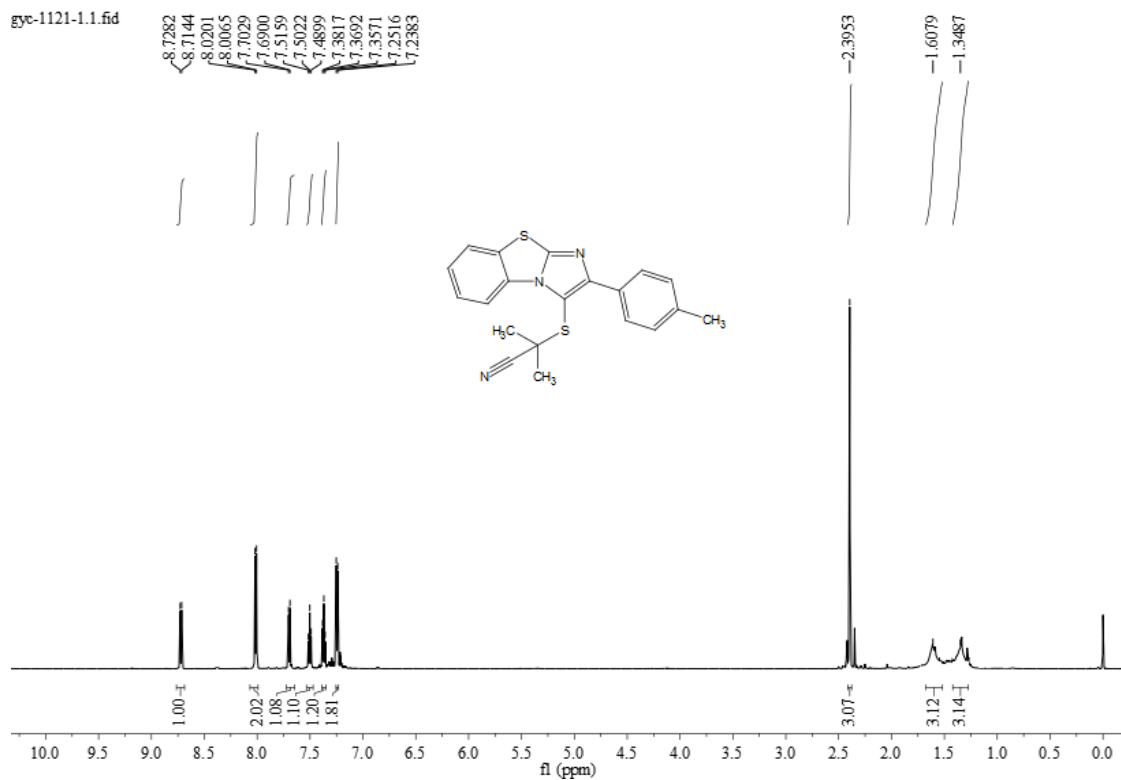

gyc-1121-1.2.fid

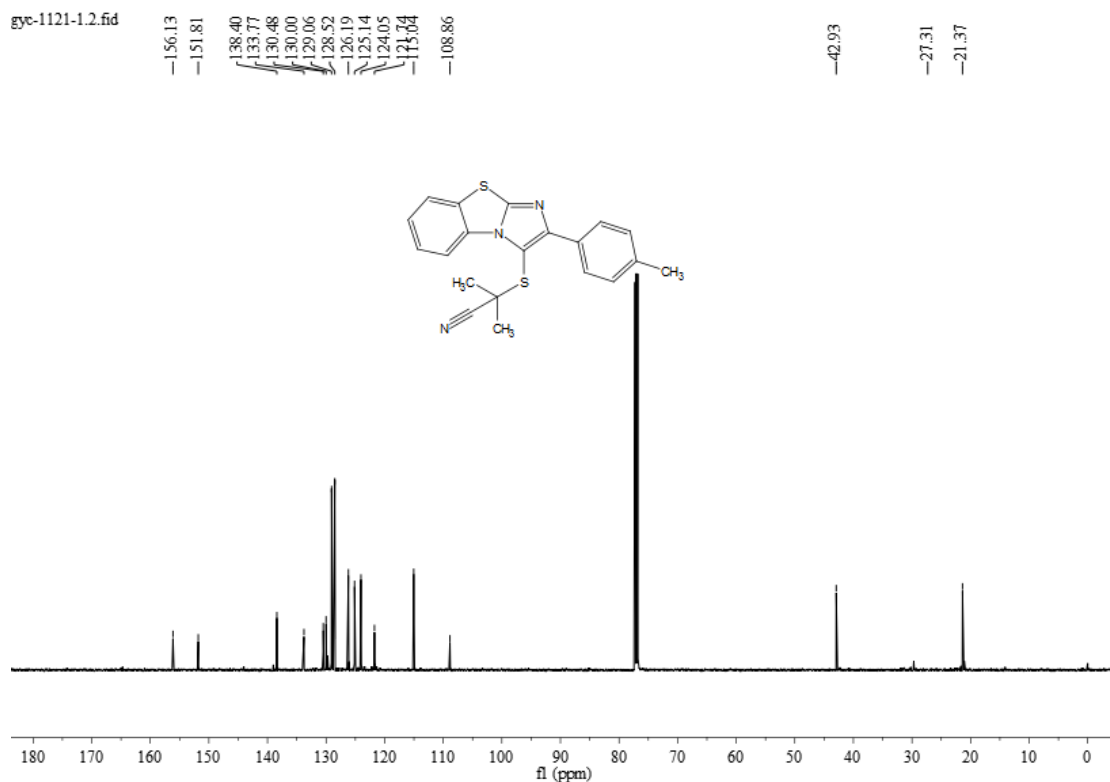

2-methyl-2-((2-phenylimidazo[1,2-a]pyridin-3-yl)thio)propanoic acid (27)

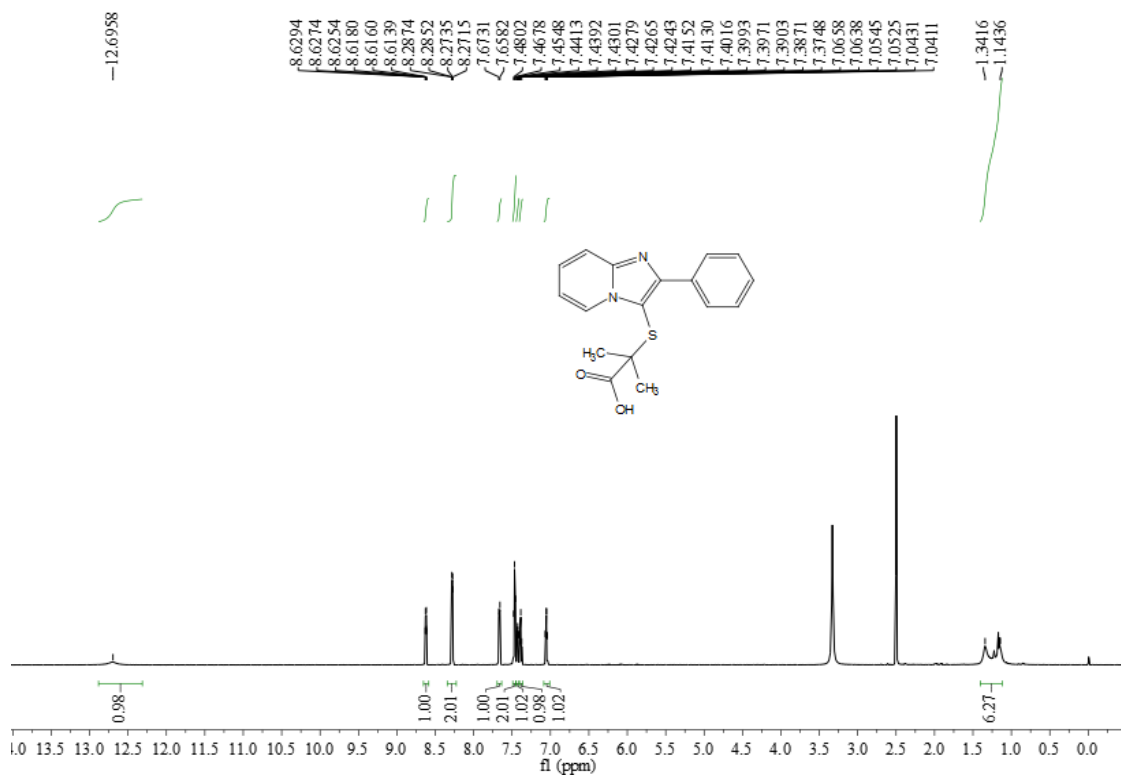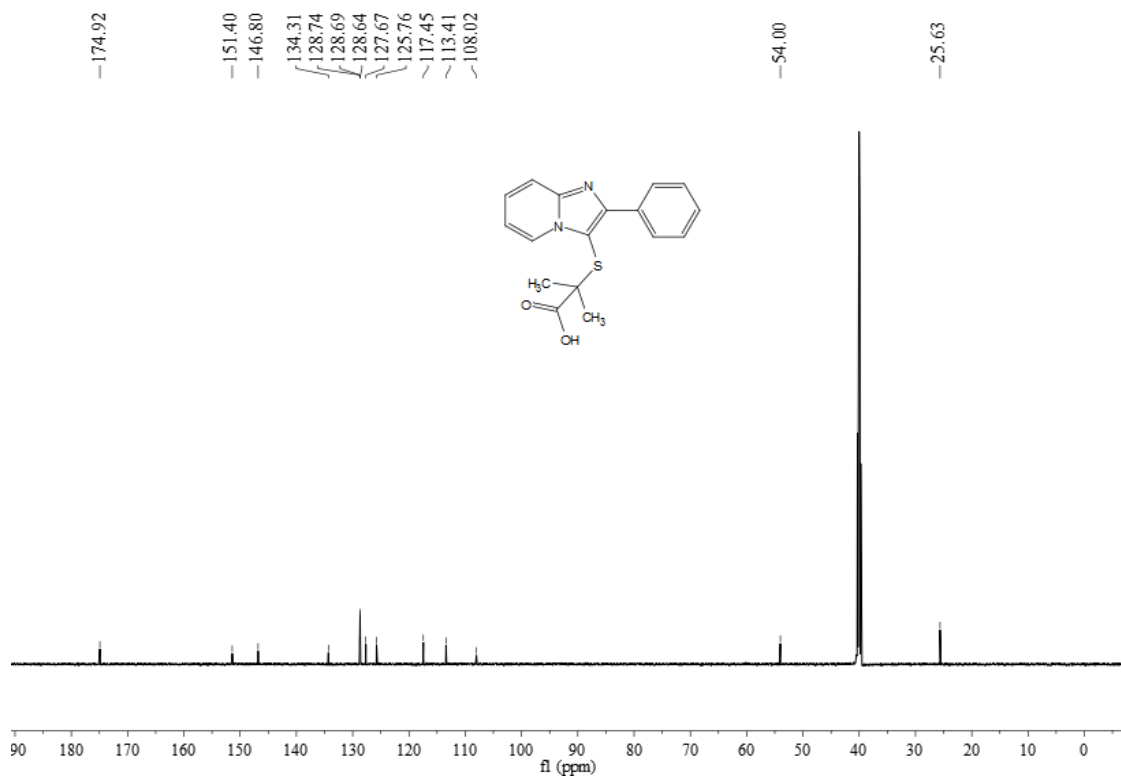

2-methyl-2-((2-phenylimidazo[1,2-a]pyridin-3-yl)thio)-N-(thiazol-2-yl)propanamide (28)

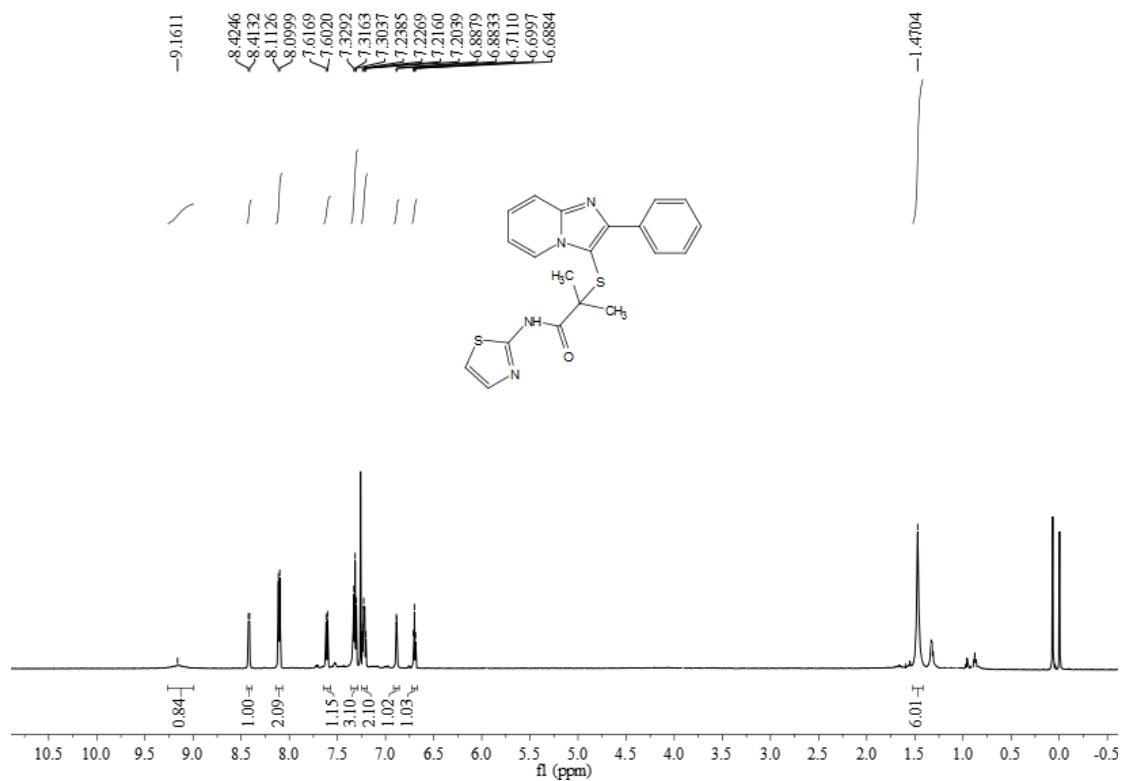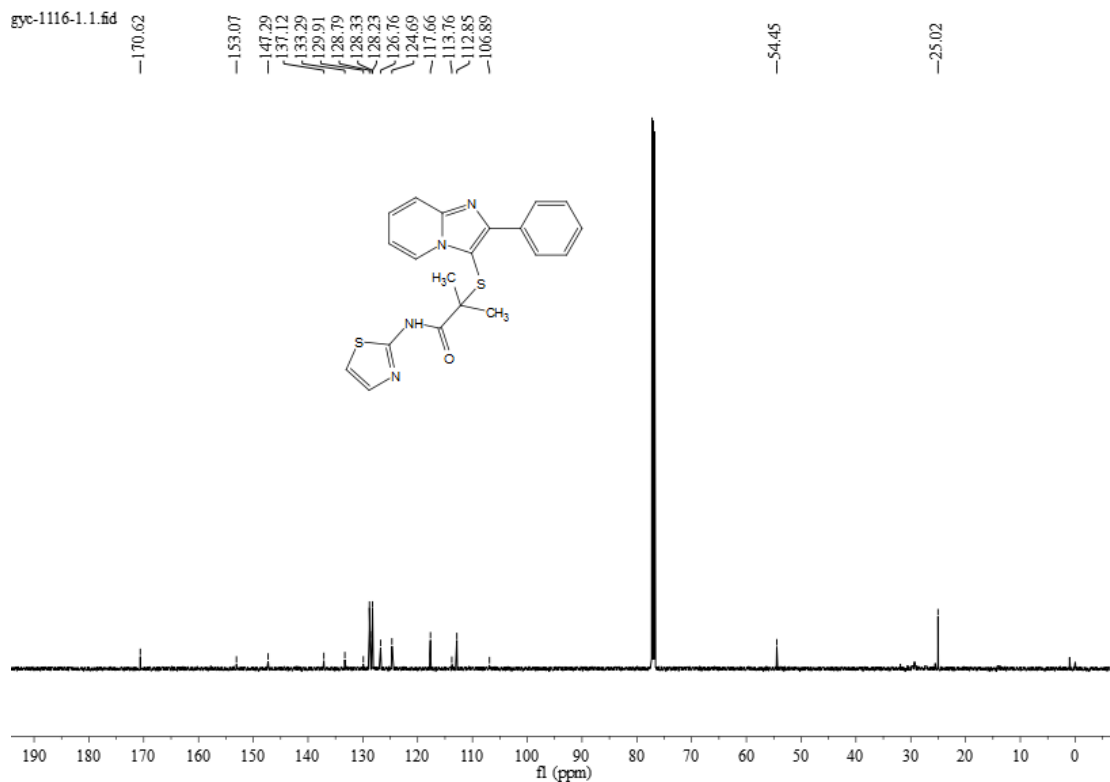

Supplement: c8ob03191f1.pdf [file c8ob03191f1.pdf]
